# Supplementary material for: Genome-wide analysis of H4K5 acetylation associated with fear memory in mice
Source: PubMed Central journal article supplement (PMC3751108; doi:10.1186/1471-2164-14-539), 2013-08-08
Supplement: 1471-2164-14-539-S1.pdf [file 1471-2164-14-539-S1.pdf]

# Genome-Wide Analysis of H4K5 Acetylation Associated with Fear Memory in Mice

C. Sehwan Park<sup>1\*</sup>, Hubert Rehrauer<sup>2</sup>, Isabelle M. Mansuy<sup>1\*</sup>

<sup>1</sup> Brain Research Institute, Medical Faculty of University of Zürich,  
and Department of Health Science and Technology, ETH Zürich

<sup>2</sup> Functional Genomics Center of Zürich  
University of Zürich and ETH Zürich  
Winterthurerstrasse 190  
8057 Zürich  
Switzerland

## **\*Corresponding authors:**

Isabelle M. Mansuy  
[mansuy@hifo.uzh.ch](mailto:mansuy@hifo.uzh.ch)

C. Sehwan Park  
[cpark@list.mavt.ethz.ch](mailto:cpark@list.mavt.ethz.ch)

Brain Research Institute  
University of Zürich  
Winterthurerstrasse 190  
CH-8057 Zürich  
Switzerland  
Phone +41 44 635 3360  
Fax +41 44 635 3303

### **Supplementary Figures:**

Supplementary Figure 1. Correlation of gene expression to mock IgG-IP reads.

Supplementary Figure 2. Correlation of H4K5ac clusters to gene expression in control.

Supplementary Figure 3. Correlation of genes by acetylation and gene expression in the promoter, CDS, and 3'-UTR.

Supplementary Figure 4. Effect of TFBS on H4K5ac and IgG-IP clusters in control.

Supplementary Figure 5. Identification of genes differentially acetylated for H4K5 with peak-calling algorithms.

### **Supplementary Tables:**

Supplementary Table 1. Mapping statistics following alignment of ChIP-Seq reads.

Supplementary Table 2. MACS analysis of H4K5ac-enriched genomic regions in FC over control.

Supplementary Table 3. MACS analysis of H4K5ac-enriched genomic regions in control over FC.

Supplementary Table 4. DAVID analysis of genes differentially acetylated for H4K5 in FC over control as identified by MACS.

Supplementary Table 5. DAVID analysis of genes differentially acetylated for H4K5 in control over FC as identified by MACS.

Supplementary Table 6. Oligonucleotides used for quantitative RT-PCR.

**Sequence data from this study has been submitted to NCBI Gene Expression Omnibus database (<http://www.ncbi.nlm.nih.gov/geo/>) and assigned the identifier (accession no. GSE30325).**

## Supplementary Figures

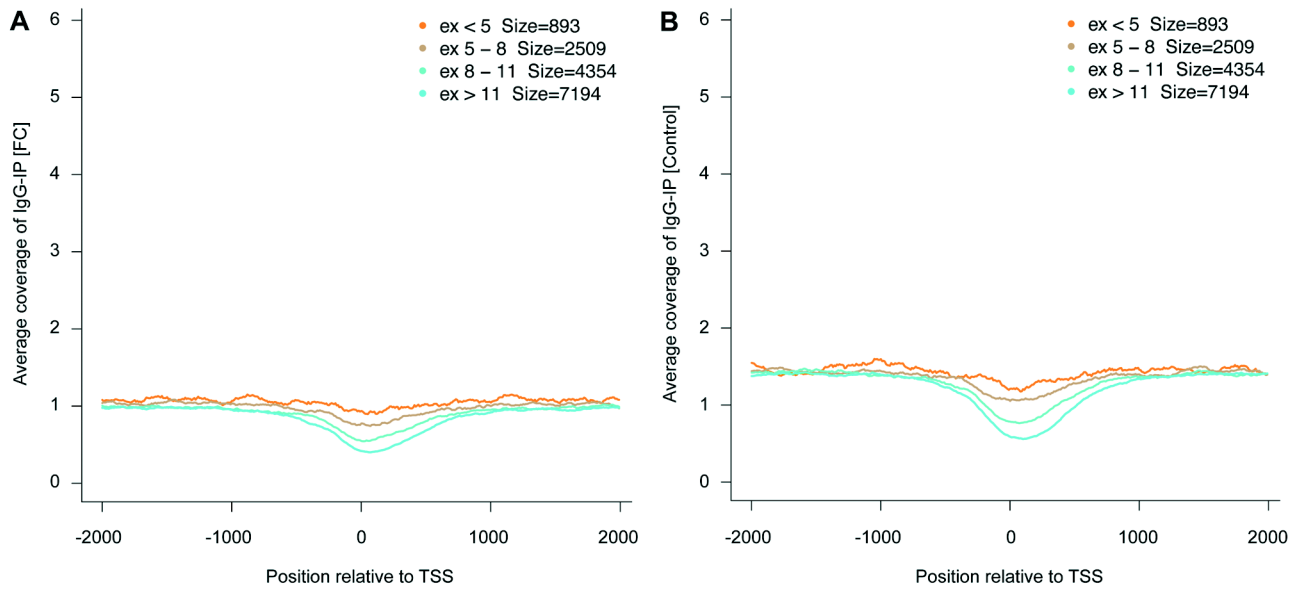

**Supplementary Figure 1. Correlation of gene expression to mock IgG-IP reads.** (A, B) Genes are categorized into four bins from lowest (ex < 5; orange) to highest (ex > 11; blue) expressed genes and correlated to average coverage for IgG-IP from (A) FC or (B) Control samples. Average read coverage  $\pm$  2 kb relative to the TSS.

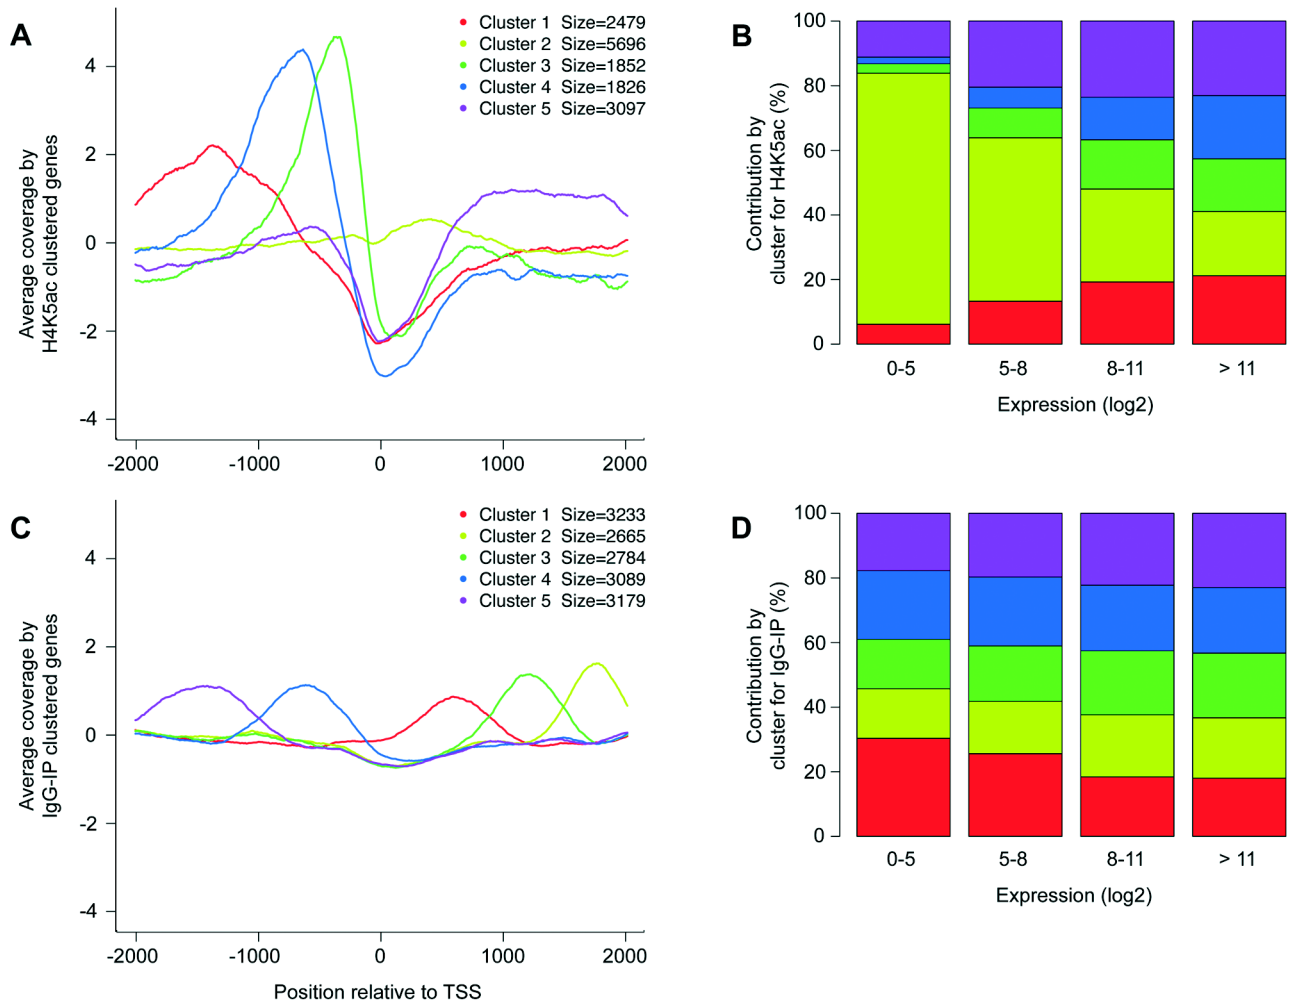

**Supplementary Figure 2. Correlation of H4K5ac clusters to gene expression in control.**

(A) Genes acetylated for H4K5 in control are clustered based on acetylation profiles  $\pm 2$  kb relative to the TSS. Clusters 1 (red), 3 (green), and 4 (blue) occur in promoter regions, cluster 5 (violet) occurs in the CDS, and cluster 2 (yellow) is unenriched for H4K5ac. (B) Contribution of gene clusters in control with respect to levels of gene expression show higher contribution of clusters enriched for H4K5ac with higher expression. (C) Gene clusters from IgG-IP reads in control are uniformly distributed and consist of clusters 4 (blue) and 5 (violet) in the promoter region, and clusters 1 (red), 2 (yellow), and 3 (green) in the CDS. (D) IgG-IP clusters show relatively no change in contribution with gene expression levels.

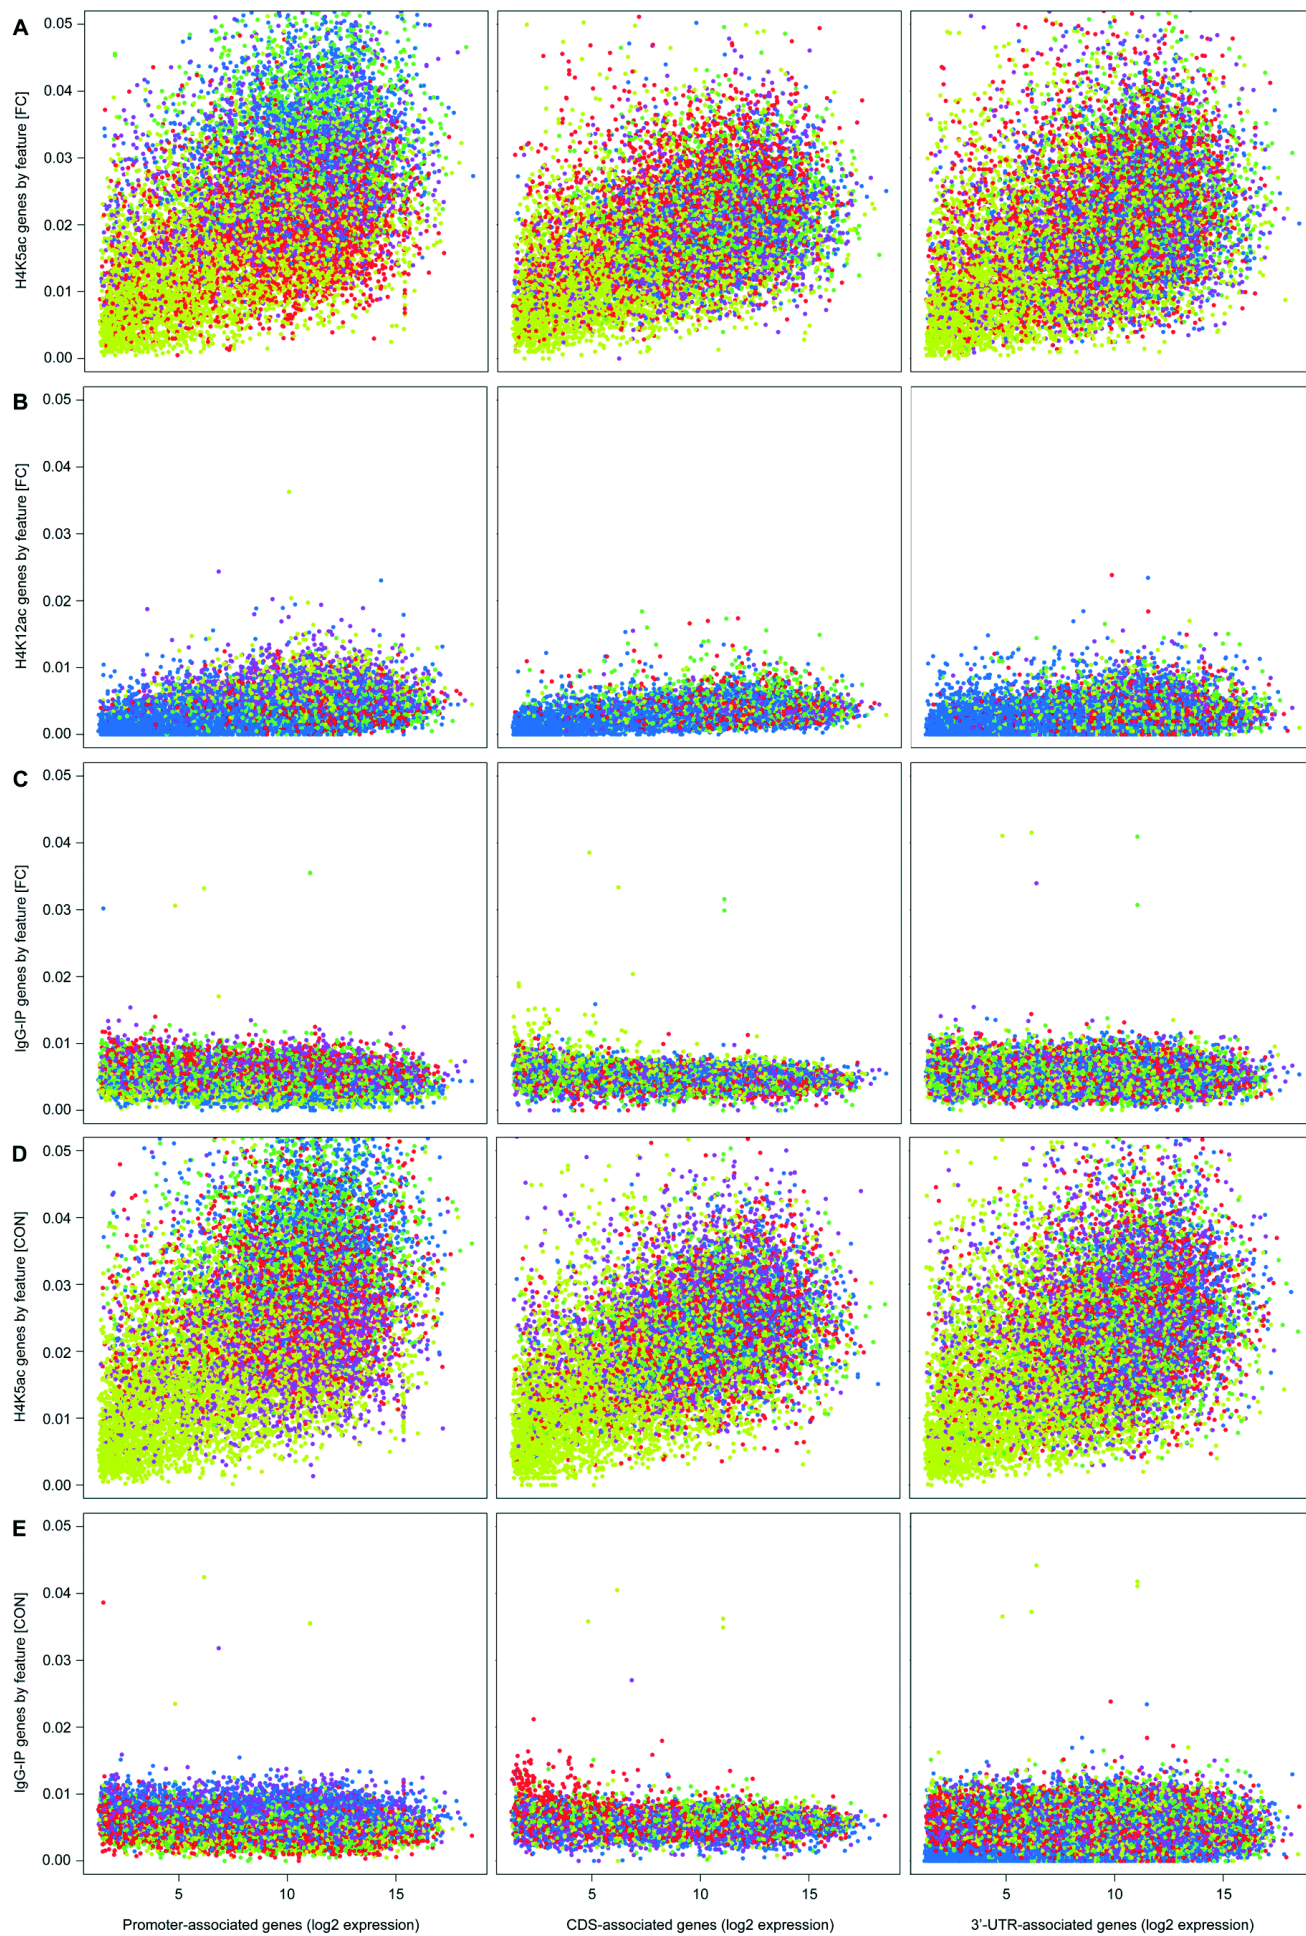

**Supplementary Figure 3. Correlation of genes by acetylation and gene expression in the promoter, CDS, and 3'-UTR.** (A) Correlation of gene expression to promoter-associated H4K5ac (left;  $r = 0.4624$ ), CDS-associated H4K5ac (middle;  $r = 0.4586$ ), and 3'-UTR-associated H4K5ac (right;  $r = 0.4058$ ) by FC. (B) Correlation of gene expression to promoter-associated H4K12ac (left;  $r = 0.4040$ ), CDS-associated H4K12ac (middle;  $r = 0.3899$ ), and 3'-UTR-associated H4K12ac (right;  $r = 0.2679$ ) by FC. (C) Correlation of gene expression to promoter-associated IgG-IP reads (left;  $r = -0.1352$ ), CDS-associated IgG-IP reads (middle;  $r = -0.1424$ ), and 3'-UTR-associated IgG-IP reads (right;  $r = -0.0750$ ) by FC. (D) Correlation of gene expression to promoter-associated H4K5ac (left;  $r = 0.4681$ ), CDS-associated H4K5ac (middle;  $r = 0.4883$ ), and 3'-UTR-associated H4K5ac (right;  $r = 0.4222$ ) in control (CON). (E) Correlation of gene expression to promoter-associated IgG-IP reads (left;  $r = -0.1053$ ), CDS-associated IgG-IP reads (middle;  $r = -0.0990$ ), and 3'-UTR-associated IgG-IP reads (right;  $r = -0.0413$ ) in control (CON). Clusters are defined in Figure 4A, 4C, and 4E and Supplementary Figures 4A and 4C.

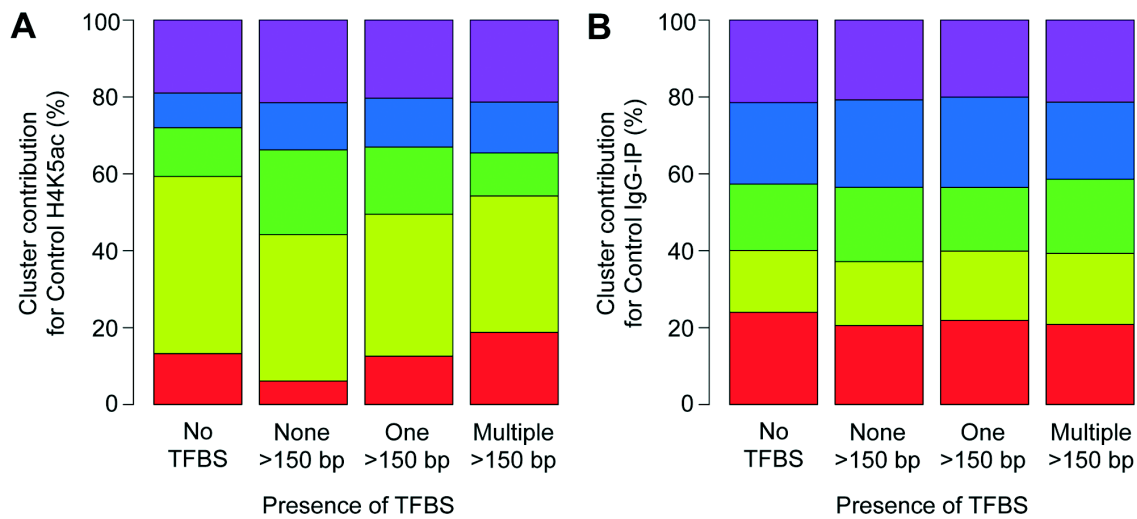

**Supplementary Figure 4. Effect of TFBS on H4K5ac and IgG-IP clusters in control.** The relative contribution of gene clusters for (A) H4K5ac and (B) IgG-IP in control with either no TFBS present in the promoter, or no TFBS, one TFBS, and multiple TFBS upstream of -150 bp relative to the TSS. Clusters are defined in Supplementary Figures 4A and 4C.

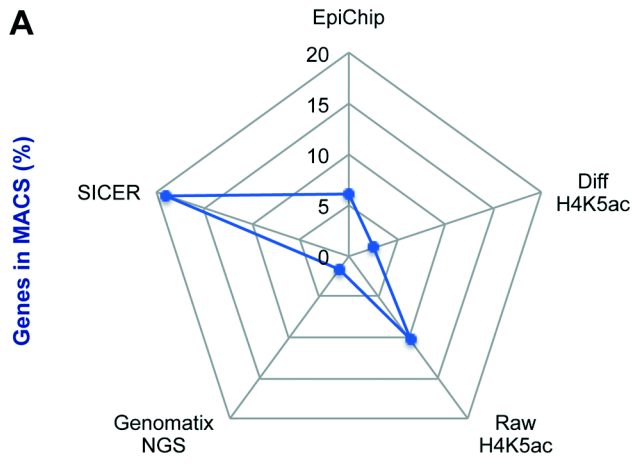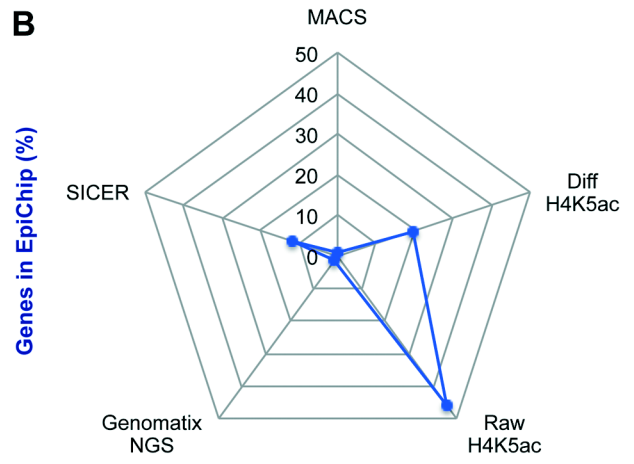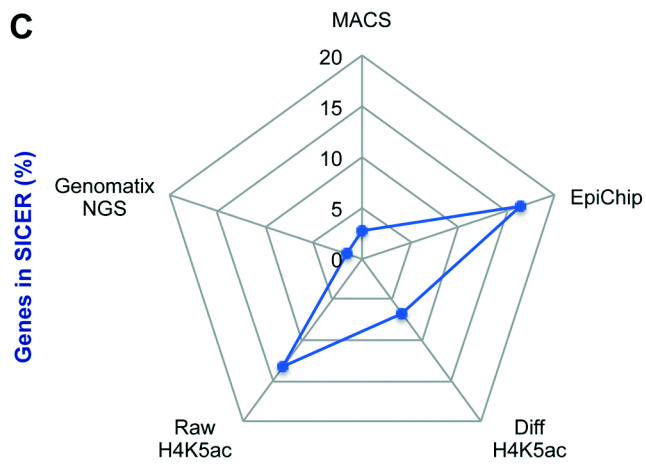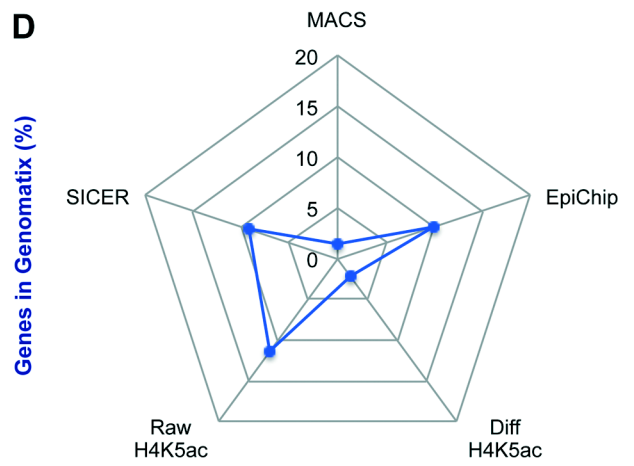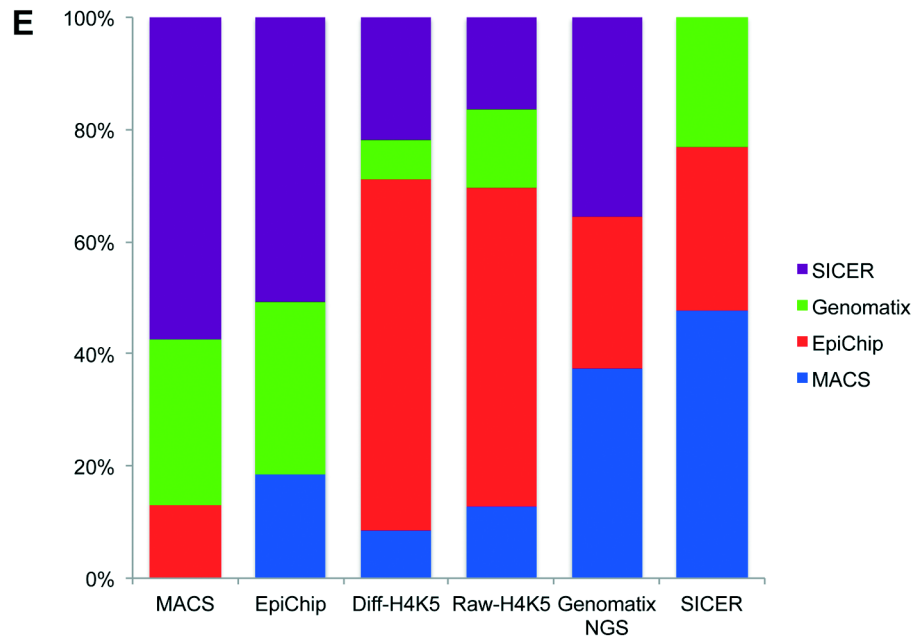



**Supplementary Figure 5. Identification of genes differentially acetylated for H4K5 with peak-calling algorithms.** Percentage of genes identified by (A) MACS, (B) EpiChIP, (C) SICER, and (D) Genomatix NGS against genes identified by other peak-calling algorithms, or against genes with tag densities with a threshold of greater than 50 reads in FC (Raw H4K5ac) or greater than 50 reads in FC and less than 40 reads in control in the promoter (Diff H4K5ac). Genes identified by MACS had the highest overlap with genes identified by SICER (19%), followed by Raw H4K5ac (10%) and EpiChip (6%). EpiChip had high overlap with Raw H4K5ac and Diff H4K5ac, with 46% and 19% of genes overlapping, respectively, followed by SICER at 12%. Since EpiChIP identified acetylated genes and determined the presence or absence of genes between two treatment groups, similar to a criteria-based approach, EpiChIP, Raw H4K5ac, and Diff H4K5ac identified a high percentage of the same genes. SICER had moderate overlap with EpiChip (16%), Raw H4K5ac (13%) and Diff H4K5ac (7%), and low overlap with MACS (2.7%) and Genomatix (1.6%). Genomatix had moderate overlap with Raw H4K5ac (11%), MACS (10%) and SICER (9%). (E) Proportion of genes identified by SICER (violet), Genomatix (green), EpiChIP (red), and MACS (blue) as a percentage of all genes identified by each algorithm and against Raw H4K5ac and Diff H4K5ac in a scaling matrix. The disproportionate number of genes found to overlap between algorithms can be attributed to the different number of genes identified by each algorithm, based on different parameters unique to each algorithm.

**Supplementary Table 1. Mapping statistics following alignment of ChIP-Seq reads**

| Sample              | Total reads | Reads mapped | Mapped [%] | No. of start points | Average reads [promoter] | Median reads [promoter] | Average reads [gene] | Median reads [gene] |
|---------------------|-------------|--------------|------------|---------------------|--------------------------|-------------------------|----------------------|---------------------|
| <b>Control-H4K5</b> | 54326574    | 41559675     | 76.5       | 36423222            | 46.16                    | 45                      | 894.22               | 280                 |
| <b>Control-IC</b>   | 60886714    | 47254187     | 77.6       | 37676866            | 27.78                    | 28                      | 644.23               | 219                 |
| <b>Control-IgG</b>  | 30808841    | 24126269     | 78.3       | 17969145            | 12.00                    | 12                      | 286.56               | 94                  |
| <b>FC-H4K5</b>      | 52343044    | 36651928     | 70.0       | 31310961            | 43.42                    | 42                      | 783.32               | 257                 |
| <b>FC-IC</b>        | 81416434    | 57848969     | 71.1       | 48795166            | 43.53                    | 44                      | 907.94               | 345                 |
| <b>FC-IgG</b>       | 29565007    | 22397408     | 75.8       | 15536790            | 10.16                    | 10                      | 244.71               | 79                  |
| <b>Sum Reads</b>    | 309346614   | 229838436    | 74.3       |                     |                          |                         |                      |                     |
| <b>Young-H4K12</b>  |             |              |            |                     | 8.68                     | 7                       | 122.73               | 46                  |

Reads were mapped and aligned to the mouse reference genome for H4K5ac, input control (IC), and IgG-IP control (IgG-IP), for control mice and mice trained by FC. H4K12ac ChIP-Seq data was obtained from Galaxy-Central (sm1186088 at <main.g2.bx.psu.edu/u/fischerlab/h/sm1186088>), remapped and analyzed using our workflow.

Supplementary Table 2. MACS analysis of H4K5ac-enriched genomic regions in FC over control

| Gene ID       | Chromosome | Start     | End       | Length | Summit | Tags | - 10*log10<br>(P-value) | Fold<br>enrichment | FDR (%) |
|---------------|------------|-----------|-----------|--------|--------|------|-------------------------|--------------------|---------|
| 1110012D08Rik | 10         | 128239616 | 128240116 | 501    | 158    | 27   | 54.76                   | 4.9                | 67.12   |
| 2310007F21Rik | 9          | 63472539  | 63473691  | 1153   | 401    | 66   | 61.17                   | 3.73               | 66.67   |
| 2310007H09Rik | 7          | 139891162 | 139893999 | 2838   | 592    | 187  | 62.41                   | 2.79               | 62.12   |
| 4930427A07Rik | 12         | 114400852 | 114402134 | 1283   | 935    | 75   | 78.23                   | 3.86               | 41.18   |
| 4933407N01Rik | 11         | 30853345  | 30853979  | 635    | 302    | 34   | 66.76                   | 4.6                | 65.91   |
| Abcc1         | 16         | 14473228  | 14473822  | 595    | 287    | 28   | 50.97                   | 4.85               | 73.52   |
| Acot7         | 4          | 151595941 | 151596961 | 1021   | 281    | 57   | 57.53                   | 3.58               | 61.68   |
| Adcy5         | 16         | 35230851  | 35232327  | 1477   | 1351   | 96   | 70.39                   | 3.29               | 58.06   |
| Adcy5         | 16         | 35232534  | 35233843  | 1310   | 308    | 77   | 53.19                   | 3.71               | 69.71   |
| Akap6         | 12         | 54033421  | 54033824  | 404    | 294    | 19   | 54.36                   | 5.3                | 65.16   |
| Ank           | 15         | 27424248  | 27425770  | 1523   | 988    | 84   | 51.69                   | 3.39               | 72.77   |
| Ank3          | 10         | 69350962  | 69352047  | 1086   | 361    | 60   | 50.78                   | 3.36               | 73.09   |
| Ap3b1         | 13         | 95138353  | 95139054  | 702    | 438    | 39   | 53.31                   | 3.62               | 69.94   |
| App           | 16         | 85001974  | 85002944  | 971    | 352    | 48   | 55.92                   | 3.62               | 63.64   |
| Arhgap26      | 18         | 39345666  | 39347697  | 2032   | 1731   | 124  | 51.44                   | 2.77               | 71.56   |
| Arhgef3       | 14         | 28179583  | 28181218  | 1636   | 260    | 86   | 61.14                   | 3.58               | 65.79   |
| Atp8a1        | 5          | 68053560  | 68054175  | 616    | 338    | 32   | 57.06                   | 6.26               | 60.87   |
| Bace1         | 9          | 45661241  | 45662797  | 1557   | 1002   | 93   | 60.74                   | 3.89               | 65.38   |
| Bach2         | 4          | 32647574  | 32649648  | 2075   | 657    | 120  | 71.28                   | 2.82               | 53.57   |
| BC019943      | 8          | 32265962  | 32266413  | 452    | 183    | 20   | 52.57                   | 5.84               | 72.28   |
| BC033915      | 9          | 45862143  | 45863455  | 1313   | 261    | 84   | 53.7                    | 3.07               | 68.67   |
| Blmh          | 11         | 76758134  | 76759132  | 999    | 839    | 60   | 94.56                   | 4.85               | 40      |
| Bola3         | 6          | 83299564  | 83300416  | 853    | 196    | 53   | 63.89                   | 4.55               | 61.82   |
| Capn8         | 1          | 184539238 | 184539696 | 459    | 124    | 24   | 61.24                   | 4.98               | 67.12   |
| Chd7          | 4          | 8725428   | 8726522   | 1095   | 256    | 65   | 52.96                   | 3.57               | 68.68   |
| Chd9          | 8          | 93543490  | 93543979  | 490    | 202    | 26   | 55.6                    | 4.74               | 64.44   |
| Cln4-2        | 7          | 7251425   | 7253416   | 1992   | 274    | 109  | 80.73                   | 3.45               | 50      |
| Clip3         | 7          | 31092747  | 31093807  | 1061   | 769    | 52   | 56.67                   | 4.66               | 63.33   |
| Col27a1       | 4          | 62936537  | 62937232  | 696    | 455    | 39   | 53.84                   | 4.37               | 69.51   |
| Col2a1        | 15         | 97822728  | 97823455  | 728    | 408    | 38   | 73.29                   | 6.3                | 65      |
| Cuedc1        | 11         | 87938994  | 87940398  | 1405   | 492    | 81   | 64.93                   | 3.26               | 64.58   |
| Ddit4         | 10         | 59419144  | 59422275  | 3132   | 2097   | 214  | 50.55                   | 3.12               | 74.56   |
| Dhdh          | 7          | 52730353  | 52731352  | 1000   | 323    | 53   | 63.15                   | 4.06               | 66.67   |
| Dnajc7        | 11         | 100481102 | 100481892 | 791    | 663    | 45   | 58.84                   | 3.62               | 60      |
| Dnm2          | 9          | 21245723  | 21246757  | 1035   | 719    | 64   | 50.47                   | 3.23               | 74.46   |
| Dtx1          | 5          | 121130423 | 121131227 | 805    | 232    | 45   | 53.17                   | 4.08               | 69.32   |
| Dusp26        | 8          | 32201922  | 32202863  | 942    | 581    | 53   | 58.33                   | 4.53               | 61.62   |
| Dym           | 18         | 75433509  | 75435656  | 2148   | 1841   | 115  | 56.72                   | 3.39               | 63.03   |
| Eftud1        | 7          | 89919723  | 89920732  | 1010   | 689    | 83   | 52.15                   | 3.43               | 71.5    |
| EG328231      | 13         | 41753894  | 41755114  | 1221   | 278    | 65   | 60.95                   | 4.41               | 64.94   |
| Erc2          | 14         | 28715423  | 28715912  | 490    | 173    | 29   | 57.79                   | 5.14               | 60.58   |
| Fam164c       | 12         | 86629532  | 86630194  | 663    | 248    | 34   | 50.88                   | 3.88               | 73.42   |
| Fbxl11        | 19         | 4334110   | 4334698   | 589    | 265    | 31   | 59.72                   | 5.33               | 65.12   |
| Frmf5         | 2          | 121378180 | 121378738 | 559    | 307    | 30   | 64.49                   | 5.61               | 64      |
| Galnt1        | 12         | 81626980  | 81630339  | 3360   | 1064   | 235  | 53.57                   | 2.26               | 69.82   |

|               |    |           |           |      |      |     |       |      |       |
|---------------|----|-----------|-----------|------|------|-----|-------|------|-------|
| Glrx2         | 1  | 145585927 | 145586529 | 603  | 336  | 32  | 64.34 | 5.07 | 61.54 |
| Glt25d2       | 1  | 154309550 | 154309947 | 398  | 261  | 19  | 51.96 | 5.53 | 73.1  |
| Gnal          | 18 | 67292215  | 67292652  | 438  | 154  | 20  | 54.61 | 5.3  | 66.22 |
| Gng3-Bscl2    | 19 | 8911425   | 8912681   | 1257 | 293  | 74  | 54.51 | 3.32 | 65.77 |
| Gpd1          | 15 | 99554121  | 99555643  | 1523 | 609  | 98  | 57.81 | 3.8  | 61.17 |
| Grid1         | 14 | 35680988  | 35681561  | 574  | 278  | 27  | 50.91 | 5.35 | 73.3  |
| Homer1        | 13 | 94169627  | 94170274  | 648  | 188  | 36  | 50.06 | 3.32 | 74.17 |
| Hyou1         | 9  | 44198915  | 44199731  | 817  | 127  | 37  | 57.7  | 3.89 | 60    |
| Itn1          | 16 | 91770169  | 91770925  | 757  | 357  | 45  | 61.19 | 3.43 | 67.57 |
| Kcnd2         | 6  | 21246050  | 21246462  | 413  | 164  | 22  | 51.85 | 5.76 | 72.86 |
| Kcnu1         | 8  | 27021784  | 27023191  | 1408 | 295  | 85  | 54.44 | 2.87 | 65.79 |
| Lrp1b         | 2  | 42051732  | 42052154  | 423  | 219  | 19  | 51.48 | 5.84 | 72.6  |
| Macf1         | 4  | 123241159 | 123243431 | 2273 | 1195 | 154 | 80.29 | 3.24 | 46.67 |
| Mad111        | 5  | 140745960 | 140746713 | 754  | 319  | 38  | 56.37 | 4.33 | 61.42 |
| Man1c1        | 4  | 134149132 | 134149866 | 735  | 460  | 41  | 55.39 | 4.04 | 65.94 |
| Mapre3        | 5  | 31132547  | 31133186  | 640  | 369  | 30  | 56.95 | 5.9  | 61.21 |
| Mboat2        | 12 | 25555975  | 25556753  | 779  | 194  | 44  | 50.12 | 3.96 | 74.37 |
| Mdga2         | 12 | 68230792  | 68231486  | 695  | 140  | 41  | 56.65 | 3.28 | 62.81 |
| Megf11        | 9  | 64441569  | 64442007  | 439  | 314  | 21  | 55.14 | 5.94 | 64.79 |
| Mgll          | 6  | 88770740  | 88771927  | 1188 | 874  | 65  | 58.19 | 4.12 | 62    |
| Mlxip         | 5  | 123866851 | 123867917 | 1067 | 709  | 68  | 71.04 | 3.71 | 55.17 |
| Msra          | 14 | 64763834  | 64765925  | 2092 | 702  | 135 | 59.2  | 2.77 | 62.22 |
| Mvp           | 7  | 134151638 | 134152815 | 1178 | 311  | 68  | 69.08 | 3.55 | 59.46 |
| Mybphl        | 3  | 108175187 | 108176388 | 1202 | 245  | 68  | 67.36 | 3.61 | 64.29 |
| Myo7a         | 7  | 105250599 | 105251841 | 1243 | 921  | 95  | 64.09 | 4.4  | 61.11 |
| Ndufa13-Tssk6 | 8  | 72427295  | 72428236  | 942  | 325  | 55  | 57.26 | 3.99 | 60.91 |
| Nfix          | 8  | 87289040  | 87290720  | 1681 | 290  | 99  | 53.06 | 2.39 | 69.44 |
| Nrp2          | 1  | 62763181  | 62764730  | 1550 | 246  | 86  | 53.68 | 3.34 | 67.86 |
| Nrxn1         | 17 | 90933664  | 90934143  | 480  | 181  | 26  | 50.45 | 4.35 | 74.25 |
| Nrxn2         | 19 | 6450022   | 6451702   | 1681 | 287  | 112 | 72.84 | 3.04 | 56.52 |
| Ntrk2         | 13 | 59111781  | 59112426  | 646  | 282  | 39  | 67.65 | 5.1  | 65    |
| Nuak1         | 10 | 83856325  | 83859850  | 3526 | 1466 | 221 | 59.85 | 2.44 | 63.53 |
| Pacrg         | 17 | 10633926  | 10635965  | 2040 | 741  | 130 | 73.87 | 3.91 | 63.16 |
| Pgs1          | 11 | 117847065 | 117848200 | 1136 | 441  | 70  | 54.45 | 3.85 | 66.23 |
| Phactr3       | 2  | 177978069 | 177979491 | 1423 | 615  | 89  | 53.99 | 2.93 | 68.32 |
| Pik3cd        | 4  | 149048746 | 149049553 | 808  | 263  | 38  | 94.47 | 5.03 | 33.33 |
| Plekha6       | 1  | 135164171 | 135165378 | 1208 | 825  | 69  | 55.18 | 3.27 | 64.54 |
| Ppm1h         | 10 | 122228941 | 122229630 | 690  | 257  | 39  | 54.37 | 4.8  | 65.58 |
| Prkcdbp       | 7  | 112628633 | 112629610 | 978  | 145  | 58  | 50.99 | 3.25 | 73.85 |
| Pum1          | 4  | 130309674 | 130310586 | 913  | 324  | 48  | 54.31 | 4.27 | 65.38 |
| Rab31         | 17 | 66120603  | 66121615  | 1013 | 789  | 56  | 65.27 | 3.96 | 65.22 |
| Rgnef         | 13 | 98849079  | 98849700  | 622  | 244  | 36  | 57.14 | 5.62 | 59.29 |
| Rnf220        | 4  | 117088161 | 117088767 | 607  | 292  | 29  | 51.46 | 6.3  | 71.9  |
| Rpgr          | X  | 9792467   | 9792935   | 469  | 305  | 24  | 59.6  | 5.43 | 64.37 |
| Ryr3          | 2  | 112856455 | 112856985 | 531  | 313  | 26  | 59.15 | 6.72 | 61.54 |
| Sap30bp       | 11 | 115815431 | 115816728 | 1298 | 419  | 77  | 50.14 | 2.93 | 74.68 |
| Sema7a        | 9  | 57795278  | 57800233  | 4956 | 3000 | 325 | 68.82 | 2.58 | 60.53 |
| Serpina9      | 12 | 105251442 | 105251882 | 441  | 221  | 21  | 55.2  | 5.97 | 65    |
| Sfi1          | 11 | 3069263   | 3074906   | 5644 | 4226 | 549 | 56.39 | 2.53 | 61.9  |
| Sfi2          | 11 | 3090863   | 3095267   | 4405 | 504  | 468 | 57.95 | 2.36 | 62.38 |
| Sfrs16        | 7  | 20187428  | 20188264  | 837  | 337  | 47  | 54.3  | 3.91 | 65.61 |
| Slc24a2       | 4  | 86788722  | 86789442  | 721  | 435  | 43  | 53.72 | 3.52 | 69.09 |

|                                       |    |           |           |      |      |     |       |      |       |
|---------------------------------------|----|-----------|-----------|------|------|-----|-------|------|-------|
| Slc43a2                               | 11 | 75364821  | 75366785  | 1965 | 1075 | 133 | 50.25 | 2.73 | 74.58 |
| Slc8a1                                | 17 | 82035622  | 82036243  | 622  | 331  | 33  | 51.95 | 5.03 | 72.73 |
| Slc9a1                                | 4  | 132954499 | 132955715 | 1217 | 571  | 65  | 64.25 | 3.94 | 60.38 |
| Slc9a9                                | 9  | 95054767  | 95055701  | 935  | 459  | 46  | 50.94 | 3.33 | 73.64 |
| Slco2b1                               | 7  | 106816987 | 106818064 | 1078 | 507  | 57  | 51.98 | 2.85 | 73.47 |
| Ssbp3                                 | 4  | 106594937 | 106596362 | 1426 | 266  | 76  | 60.21 | 3.84 | 61.9  |
| St3gal2                               | 8  | 113473923 | 113475265 | 1343 | 1074 | 71  | 69.77 | 4.15 | 55.88 |
| St3gal4                               | 9  | 34914959  | 34916615  | 1657 | 1290 | 99  | 52.46 | 3.29 | 71.12 |
| Stat5b                                | 11 | 100712263 | 100713084 | 822  | 464  | 44  | 51.24 | 3.62 | 73.11 |
| Tbc1d16                               | 11 | 119028647 | 119029122 | 476  | 174  | 24  | 51.78 | 4.13 | 73    |
| Tm4sf5                                | 11 | 70323360  | 70323958  | 599  | 440  | 32  | 50.57 | 3.83 | 74.45 |
| Tmem63b                               | 17 | 45800406  | 45801001  | 596  | 346  | 31  | 50.99 | 4.53 | 74.19 |
| Tmod1                                 | 4  | 46107724  | 46109712  | 1989 | 618  | 123 | 72.69 | 3.86 | 58.33 |
| Tpk1                                  | 6  | 43615181  | 43615996  | 816  | 613  | 55  | 52.97 | 3.26 | 69.06 |
| Zc3h7b                                | 15 | 81590622  | 81591235  | 614  | 270  | 34  | 55.09 | 5.9  | 64.34 |
| Zfp551                                | 7  | 13007286  | 13008100  | 815  | 500  | 46  | 51.98 | 3.68 | 73.33 |
| Zhx2                                  | 15 | 57584648  | 57586251  | 1604 | 962  | 86  | 53.09 | 2.99 | 69.1  |
| Zufsp                                 | 10 | 33669849  | 33670520  | 672  | 121  | 35  | 52.3  | 3.83 | 73.02 |
| Mgat4a-Tsga10                         | 1  | 37744815  | 37745607  | 793  | 591  | 42  | 51.58 | 3.75 | 73.53 |
| Als2-Fzd7                             | 1  | 59521532  | 59522143  | 612  | 267  | 30  | 53.54 | 5.03 | 69.41 |
| Qsox1-Tor1aip1                        | 1  | 157775720 | 157776146 | 427  | 255  | 19  | 50.42 | 5.26 | 73.62 |
| Aldh8a1-Sgk1                          | 10 | 21370476  | 21371498  | 1023 | 418  | 64  | 63.89 | 3.27 | 60.71 |
| Cdc2l6-Slc22a16                       | 10 | 40233516  | 40236200  | 2685 | 1979 | 188 | 70.78 | 2.85 | 60    |
| Epyc-Atp2b1                           | 10 | 97881022  | 97881759  | 738  | 168  | 34  | 59.24 | 4.74 | 62.92 |
| Lemd3-Wif1                            | 10 | 120417184 | 120417704 | 521  | 356  | 26  | 50.45 | 4.32 | 74.25 |
| Tns3-Hus1                             | 11 | 8857964   | 8858489   | 526  | 254  | 25  | 52.47 | 4.76 | 71.51 |
| Arf1-Wnt3a                            | 11 | 59041830  | 59042711  | 882  | 263  | 55  | 60.58 | 4.24 | 64.56 |
| Nf1-Rab11fip4                         | 11 | 79403641  | 79404371  | 731  | 124  | 42  | 56.46 | 3.92 | 63.93 |
| OTTMUSG00000002038-OTTMUSG00000002043 | 11 | 94578096  | 94579223  | 1128 | 256  | 62  | 60.45 | 3.39 | 61.45 |
| Myst2-5730593F17Rik                   | 11 | 95186866  | 95188019  | 1154 | 299  | 55  | 71.62 | 4.04 | 51.85 |
| Cacng4-Cacng5                         | 11 | 107667036 | 107667466 | 431  | 157  | 20  | 55.67 | 6.37 | 64.18 |
| Hs1bp3-Rhob                           | 12 | 8408846   | 8409661   | 816  | 565  | 37  | 57.6  | 5.76 | 62.26 |
| Hs1bp3-Rhob                           | 12 | 8455474   | 8458840   | 3367 | 588  | 213 | 51.48 | 2.91 | 72.25 |
| Stxbp6-Foxg1                          | 12 | 46175587  | 46176414  | 828  | 266  | 45  | 73.01 | 5    | 59.09 |
| Arhgap5-Akap6                         | 12 | 53772582  | 53773052  | 471  | 225  | 21  | 50.09 | 4.92 | 74.48 |
| Abcd4-7420416P09Rik                   | 12 | 85958439  | 85959170  | 732  | 356  | 40  | 50.75 | 3.55 | 72.77 |
| Kcnk13-Psmc1                          | 12 | 101311702 | 101312431 | 730  | 356  | 41  | 62.46 | 3.83 | 63.08 |
| Clmn-                                 | 12 | 106103352 | 106104713 | 1362 | 474  | 100 | 93.97 | 3.7  | 28.57 |
| Gpr141-Elmo1                          | 13 | 20225030  | 20226202  | 1173 | 937  | 57  | 56.44 | 3.5  | 63.41 |
| E2f3-Mboat1                           | 13 | 30226671  | 30227306  | 636  | 387  | 35  | 57.37 | 4.53 | 60.55 |
| Cks2-Secisbp2                         | 13 | 51746480  | 51747071  | 592  | 354  | 27  | 58.45 | 5.13 | 60.2  |
| Trpc7-Spock1                          | 13 | 57253240  | 57254079  | 840  | 216  | 42  | 52.51 | 4.06 | 71.89 |
| Cd180-Sfrs12                          | 13 | 103910509 | 103911148 | 640  | 213  | 36  | 54.4  | 3.75 | 65.36 |
| Ddhd1-LOC218963                       | 14 | 46278035  | 46279134  | 1100 | 327  | 66  | 102   | 5.46 | 33.33 |
| Peli2-6720456H20Rik                   | 14 | 48991430  | 48992090  | 661  | 125  | 32  | 52.62 | 3.54 | 72.13 |
| Jph4-Dhrs2                            | 14 | 55765131  | 55766636  | 1506 | 324  | 85  | 62.84 | 3.48 | 62.9  |
| Mtmt6-Fam123a                         | 14 | 60981392  | 60982488  | 1097 | 436  | 63  | 67.22 | 3.86 | 65.12 |
| AW549877-Oxct1                        | 15 | 3975344   | 3976558   | 1215 | 912  | 69  | 63.05 | 4.19 | 63.33 |
| Wdr67-BC030396                        | 15 | 57815665  | 57816331  | 667  | 414  | 34  | 56.26 | 4.9  | 62.79 |
| Wnt7b-Ppara                           | 15 | 85429695  | 85431089  | 1395 | 1208 | 76  | 56.4  | 3.66 | 62.4  |
| Hdac10-Mapk12                         | 15 | 88959059  | 88959895  | 837  | 538  | 58  | 62.26 | 4.01 | 61.76 |
| Slc2a13-Lrrk2                         | 15 | 91502696  | 91503576  | 881  | 497  | 46  | 63.07 | 4.39 | 64.41 |

|                             |    |           |           |      |      |     |       |      |       |
|-----------------------------|----|-----------|-----------|------|------|-----|-------|------|-------|
| Snx4-Zfp148                 | 16 | 33343895  | 33344965  | 1071 | 757  | 59  | 53.31 | 3.73 | 69.54 |
| Parp9-Kpna1                 | 16 | 35981543  | 35982037  | 495  | 283  | 27  | 55.72 | 7.92 | 63.91 |
| Gap43-Zbtb20                | 16 | 42396727  | 42397157  | 431  | 272  | 21  | 53.85 | 5.72 | 69.94 |
| Hlcs-Ripply3                | 16 | 94523910  | 94524681  | 772  | 478  | 45  | 82.9  | 5.22 | 38.46 |
| Mllt4-EG635895              | 17 | 14043715  | 14044164  | 450  | 279  | 23  | 61.32 | 5.72 | 68.06 |
| Flywch2-Srrm2               | 17 | 23923545  | 23924398  | 854  | 275  | 46  | 53.9  | 5.43 | 69.75 |
| Stk38-Sfrs3                 | 17 | 29144975  | 29145705  | 731  | 544  | 47  | 51.51 | 3.92 | 72.95 |
| Spats1-EG668319-Aars2       | 17 | 45615728  | 45616491  | 764  | 405  | 47  | 68.02 | 5.03 | 64.1  |
| Daam2-Kif6                  | 17 | 49728652  | 49729417  | 766  | 267  | 38  | 69.62 | 4.59 | 60    |
| Tbc1d5-Satb1                | 17 | 51344526  | 51345175  | 650  | 458  | 36  | 52.41 | 3.23 | 71.81 |
| Ddx11-1110012J17Rik         | 17 | 66570611  | 66571171  | 561  | 281  | 23  | 53.1  | 7.43 | 69.49 |
| Ndc80-Fam179a               | 17 | 71876466  | 71877521  | 1056 | 254  | 64  | 55.46 | 3.35 | 64.96 |
| Galnt1-2700062C07Rik        | 18 | 24468105  | 24468644  | 540  | 311  | 30  | 61.93 | 4.14 | 63.38 |
| 2010001M09Rik-5133400G04Rik | 18 | 35814942  | 35815573  | 632  | 153  | 33  | 62.04 | 4.56 | 65.22 |
| Csnk1a1-Il17b               | 18 | 61825784  | 61826604  | 821  | 250  | 46  | 56.78 | 3.87 | 62.71 |
| 1810005K13Rik-Pqlc1         | 18 | 80452167  | 80452776  | 610  | 236  | 33  | 53.69 | 4.02 | 68.26 |
| Ccs-Ccdc87-Ctsf-Actn3       | 19 | 4854158   | 4855061   | 904  | 343  | 54  | 54.24 | 3.58 | 65.19 |
| Patl1-Osbp                  | 19 | 12039184  | 12039815  | 632  | 427  | 35  | 51.15 | 4.53 | 72.43 |
| Tle4-Psat1                  | 19 | 15876224  | 15877056  | 833  | 189  | 47  | 56.24 | 3.39 | 62.31 |
| Gda-1110059E24Rik           | 19 | 21645136  | 21645649  | 514  | 315  | 30  | 61.93 | 4.65 | 63.38 |
| Smarca2-Gm815               | 19 | 26920021  | 26920849  | 829  | 719  | 40  | 50.67 | 3.44 | 73.33 |
| Ranbp6-Il33                 | 19 | 29976298  | 29976887  | 590  | 374  | 33  | 58.78 | 4.8  | 59.38 |
| Pkd2l1-Scd3                 | 19 | 44267148  | 44267756  | 609  | 287  | 33  | 57.26 | 5.22 | 60.36 |
| Add3-Mxi1                   | 19 | 53355855  | 53357336  | 1482 | 316  | 84  | 53.99 | 3.06 | 68.75 |
| 4930506M07Rik-Vax1          | 19 | 59158586  | 59159006  | 421  | 223  | 19  | 51.78 | 7.43 | 72.64 |
| Gpr158-Myo3a                | 2  | 21839555  | 21840599  | 1045 | 130  | 59  | 55.36 | 3.24 | 65.47 |
| Rxra-Col5a1                 | 2  | 27620115  | 27621046  | 932  | 432  | 53  | 86.34 | 4.49 | 40    |
| Cstad-1700001O22Rik         | 2  | 30532674  | 30534049  | 1376 | 430  | 102 | 60.51 | 3.66 | 62.96 |
| Syt13-Trp53i11              | 2  | 93018989  | 93020222  | 1234 | 309  | 67  | 60.47 | 3.89 | 62.2  |
| Ttc17-Lrrc4c                | 2  | 96157595  | 96158705  | 1111 | 767  | 67  | 62.91 | 3.05 | 63.93 |
| 26000010E01Rik-Commd9       | 2  | 101709503 | 101709860 | 358  | 125  | 17  | 50.5  | 6.37 | 74.35 |
| Ldlrad3-Trim44              | 2  | 102130579 | 102131615 | 1037 | 341  | 60  | 60.53 | 3.99 | 63.75 |
| Sqrdl-Sema6d                | 2  | 124028301 | 124028805 | 505  | 204  | 27  | 52.19 | 4.42 | 71.88 |
| Banf2-Snx5                  | 2  | 144030246 | 144031093 | 848  | 296  | 44  | 62.5  | 4.49 | 64.06 |
| Dtd1-1700010M22Rik          | 2  | 144622551 | 144623005 | 455  | 229  | 20  | 51.65 | 5.79 | 72.91 |
| H13-Id1                     | 2  | 152561402 | 152562035 | 634  | 260  | 32  | 53.07 | 5.43 | 68.72 |
| Dhx35-Gm826                 | 2  | 158755713 | 158756122 | 410  | 238  | 20  | 58.98 | 6.37 | 59.57 |
| Cebpb-Ptpn1                 | 2  | 167686139 | 167686879 | 741  | 471  | 45  | 62.58 | 3.68 | 63.49 |
| Slc7a11-Ccrn4l              | 3  | 50851899  | 50852729  | 831  | 128  | 39  | 51.12 | 4.23 | 72.09 |
| Crtc2-Dennd4b               | 3  | 90069815  | 90070753  | 939  | 331  | 48  | 69.43 | 4.99 | 58.33 |
| Slc6a17-Ubl4b               | 3  | 107321005 | 107321518 | 514  | 216  | 32  | 52.25 | 4.07 | 72.63 |
| Gstm6-Gstm3                 | 3  | 107748321 | 107750133 | 1813 | 942  | 100 | 65.23 | 3.34 | 63.83 |
| Slc35a1-1700003M02Rik       | 4  | 34634713  | 34635113  | 401  | 208  | 24  | 53.46 | 5.7  | 70.18 |
| Mcart1-Gm829                | 4  | 45485044  | 45487094  | 2051 | 279  | 114 | 94.85 | 4.32 | 50    |
| Prkaa2-Ppap2b               | 4  | 104782759 | 104783499 | 741  | 151  | 39  | 50.01 | 3.83 | 73.86 |
| BC008163-Fgr                | 4  | 132517409 | 132518270 | 862  | 435  | 56  | 57.43 | 3.71 | 61.11 |
| Tardbp-Gm572                | 4  | 148001143 | 148001993 | 851  | 380  | 60  | 73.12 | 4.67 | 61.9  |
| Slc25a33-Spsb1              | 4  | 149250785 | 149252888 | 2104 | 1793 | 117 | 69.88 | 4.16 | 57.58 |
| BC046331-Lrrc47             | 4  | 153384839 | 153385843 | 1005 | 736  | 55  | 70.17 | 5.02 | 59.38 |
| Tprgl-Arhgef16              | 4  | 153535456 | 153536063 | 608  | 318  | 32  | 64.44 | 5.9  | 62.75 |
| Msx1-Stx18                  | 5  | 38429731  | 38430747  | 1017 | 283  | 53  | 56.86 | 3.92 | 61.54 |
| A230054D04Rik-Cpeb2         | 5  | 42236005  | 42236943  | 939  | 230  | 56  | 84    | 4.41 | 41.67 |

|                             |   |           |           |      |      |     |        |      |       |
|-----------------------------|---|-----------|-----------|------|------|-----|--------|------|-------|
| Ppargc1a-Dhx15              | 5 | 52260635  | 52261191  | 557  | 275  | 31  | 50.45  | 5.5  | 73.93 |
| Atp8a1-Grxcr1               | 5 | 68274728  | 68275503  | 776  | 361  | 42  | 65.44  | 4.18 | 66.67 |
| Pdk4-Dync1i1                | 6 | 5447040   | 5447631   | 592  | 251  | 31  | 51.56  | 4.18 | 73.17 |
| Repin1-Zfp775               | 6 | 48550595  | 48551738  | 1144 | 255  | 66  | 54.46  | 2.96 | 66.67 |
| Cpvl-Chn2                   | 6 | 54214699  | 54215790  | 1092 | 433  | 56  | 59.09  | 3.2  | 60.22 |
| Gpr175-4933427D06Rik        | 6 | 88874915  | 88876187  | 1273 | 772  | 71  | 50.55  | 3.39 | 74.24 |
| Foxp1-Eif4e3                | 6 | 99435648  | 99436469  | 822  | 703  | 47  | 55.07  | 3.13 | 63.45 |
| Phc1-Rimklb                 | 6 | 122290264 | 122291012 | 749  | 642  | 44  | 51     | 3.29 | 74.54 |
| Plcz1-Capza3-Plekha5        | 6 | 140286601 | 140287401 | 801  | 250  | 44  | 88.67  | 5.68 | 22.22 |
| Gltscr1-Zfp541              | 7 | 16587003  | 16587749  | 747  | 265  | 42  | 57.83  | 3.92 | 61.76 |
| Itpkc-Adck4                 | 7 | 28013642  | 28014440  | 799  | 250  | 48  | 64.83  | 3.8  | 63.27 |
| Sars2-Nfkbib                | 7 | 29541556  | 29541960  | 405  | 283  | 19  | 54.2   | 5.3  | 64.78 |
| 2610034B18Rik-Zfp710        | 7 | 87168542  | 87169804  | 1263 | 291  | 75  | 53.42  | 3.71 | 69.77 |
| Il27-Nupr1                  | 7 | 133750509 | 133751217 | 709  | 426  | 40  | 63.1   | 4.02 | 65.52 |
| Brwd2-Fgfr2                 | 7 | 136921790 | 136923080 | 1291 | 692  | 81  | 79.01  | 4.25 | 43.75 |
| lkbkb-Plat                  | 8 | 23817126  | 23817980  | 855  | 179  | 60  | 57.14  | 3.35 | 58.77 |
| Ap3m2-Myst3                 | 8 | 23968772  | 23969446  | 675  | 558  | 33  | 62.29  | 4.7  | 62.69 |
| Plekha2-Tacc1               | 8 | 26226885  | 26227277  | 393  | 256  | 21  | 54.62  | 4.39 | 66.67 |
| Wdr17-Gpm6a                 | 8 | 55809909  | 55810886  | 978  | 331  | 62  | 55.58  | 3.17 | 63.97 |
| Brd7-Nkd1                   | 8 | 91019371  | 91020547  | 1177 | 860  | 71  | 72.16  | 4.66 | 53.85 |
| Fa2h-Wdr59                  | 8 | 113962865 | 113963436 | 572  | 269  | 27  | 51.18  | 4.94 | 72.77 |
| Gan-Plcg2                   | 8 | 119784066 | 119784523 | 458  | 333  | 26  | 52.21  | 4.24 | 72.25 |
| 1810063B05Rik-Tomm20        | 8 | 129183401 | 129185775 | 2375 | 936  | 139 | 51.52  | 2.9  | 73.3  |
| 1810063B05Rik-Tomm20        | 8 | 129216780 | 129218287 | 1508 | 398  | 93  | 58.64  | 2.66 | 58.76 |
| Pgr-Maml2                   | 9 | 13217508  | 13217990  | 483  | 203  | 26  | 57.16  | 6.36 | 59.82 |
| 5730601F06Rik-2210010B09Rik | 9 | 20339457  | 20339918  | 462  | 173  | 21  | 56.41  | 6.37 | 62.9  |
| 5730601F06Rik-2210010B09Rik | 9 | 20348373  | 20349786  | 1414 | 296  | 81  | 92.56  | 4.55 | 25    |
| Pigb-Rab27a                 | 9 | 72891743  | 72892479  | 737  | 407  | 41  | 59.1   | 4.53 | 60.87 |
| Dusp7-Rpl29                 | 9 | 106279681 | 106281260 | 1580 | 347  | 96  | 52.01  | 2.47 | 73.71 |
| Hhatl-Ccdc13                | 9 | 121716186 | 121718594 | 2409 | 130  | 136 | 67.44  | 2.65 | 63.41 |
| BC023829-OTTMUSG00000017827 | X | 67730413  | 67731060  | 648  | 319  | 41  | 72.21  | 4.63 | 56    |
| Nap1i3-3110007F17Rik        | X | 120118768 | 120119302 | 535  | 260  | 33  | 56.31  | 4.54 | 62.5  |
| Vmn2r121-4932411N23Rik      | X | 121306897 | 121309002 | 2106 | 703  | 232 | 77.76  | 3.6  | 38.89 |
| Mcart6-BC031748             | X | 133583357 | 133583785 | 429  | 170  | 19  | 50.61  | 6.37 | 73.89 |
| Zfy2-Sry                    | Y | 1751651   | 1752336   | 686  | 329  | 42  | 55.07  | 4.86 | 63.89 |
| Rbmy1a1--                   | Y | 2779565   | 2784511   | 4947 | 839  | 757 | 55.99  | 2.92 | 64.12 |
| Rbmy1a1--                   | Y | 2796136   | 2797472   | 1337 | 173  | 114 | 59.44  | 2.77 | 63.64 |
| Rbmy1a1--                   | Y | 2850317   | 2854766   | 4450 | 1759 | 371 | 102.51 | 2.78 | 50    |
| Rbmy1a1--                   | Y | 2856927   | 2860188   | 3262 | 2607 | 462 | 190.56 | 3.86 | 0     |
| Rbmy1a1--                   | Y | 2860289   | 2861633   | 1345 | 373  | 156 | 84.07  | 3.73 | 45.45 |

---

Supplementary Table 3. MACS analysis of H4K5ac-enriched genomic regions in control over FC

| Gene ID       | Chromosome | Start     | End       | Length | Summit | Tags | - 10*log10<br>(P-value) | Fold<br>enrichment | FDR (%) |
|---------------|------------|-----------|-----------|--------|--------|------|-------------------------|--------------------|---------|
| 2410017P07Rik | 10         | 41528630  | 41529624  | 995    | 613    | 44   | 60.26                   | 4.46               | 100     |
| 5730410E15Rik | 15         | 44595421  | 44596381  | 961    | 212    | 47   | 50.95                   | 3.42               | 100     |
| Ankrd17       | 5          | 90671255  | 90672548  | 1294   | 515    | 53   | 50.7                    | 3.02               | 100     |
| Bst1          | 5          | 44233119  | 44234203  | 1085   | 792    | 51   | 50.03                   | 3.52               | 100     |
| Btaf1         | 19         | 37031846  | 37033506  | 1661   | 524    | 71   | 61.85                   | 3.21               | 100     |
| Btaf1         | 19         | 37045022  | 37046291  | 1270   | 896    | 58   | 78.48                   | 3.8                | 100     |
| Deaf1         | 7          | 148506807 | 148507974 | 1168   | 796    | 49   | 59.49                   | 3.63               | 100     |
| Dennd1b       | 1          | 140905883 | 140906797 | 915    | 357    | 38   | 54.61                   | 4.04               | 100     |
| Dkk3          | 7          | 119275713 | 119276798 | 1086   | 455    | 50   | 68.31                   | 3.29               | 100     |
| Dscr3         | 16         | 94741032  | 94742367  | 1336   | 980    | 66   | 74.59                   | 3.16               | 100     |
| Epha6         | 16         | 59684689  | 59686610  | 1922   | 453    | 79   | 93.68                   | 4.2                | 100     |
| Ephb2         | 4          | 136282610 | 136283375 | 766    | 482    | 33   | 51.55                   | 4.52               | 100     |
| Exoc4         | 6          | 33380654  | 33381980  | 1327   | 453    | 55   | 53.28                   | 3.55               | 100     |
| Gnaq          | 19         | 16431321  | 16433991  | 2671   | 1712   | 135  | 55.04                   | 2.85               | 100     |
| Gnas          | 2          | 174168358 | 174169458 | 1101   | 678    | 45   | 50.57                   | 3.56               | 100     |
| Hspa12a       | 19         | 58921296  | 58923287  | 1992   | 1534   | 84   | 51.32                   | 3.26               | 100     |
| Ide           | 19         | 37352560  | 37354564  | 2005   | 1399   | 97   | 53.77                   | 3.02               | 100     |
| Ide           | 19         | 37385073  | 37386814  | 1742   | 869    | 84   | 79.23                   | 3.66               | 100     |
| ints6         | 14         | 63369309  | 63370031  | 723    | 288    | 31   | 52.43                   | 4.2                | 100     |
| Ipo11         | 13         | 107668702 | 107669735 | 1034   | 831    | 45   | 71.89                   | 4.04               | 100     |
| Klf11         | 12         | 25343343  | 25344561  | 1219   | 780    | 56   | 60.78                   | 3.29               | 100     |
| Klhl7         | 5          | 23621852  | 23622907  | 1056   | 647    | 45   | 53.74                   | 3.99               | 100     |
| Loxl2         | 14         | 70045877  | 70048904  | 3028   | 1129   | 151  | 62.3                    | 2.51               | 100     |
| Loxl2         | 14         | 70084857  | 70087627  | 2771   | 1833   | 156  | 58.4                    | 2.99               | 100     |
| Loxl2         | 14         | 70088240  | 70090180  | 1941   | 221    | 102  | 78.18                   | 3.49               | 100     |
| Msi2          | 11         | 88408110  | 88408902  | 793    | 434    | 32   | 52.64                   | 4.13               | 100     |
| Mtap2         | 1          | 66274228  | 66275231  | 1004   | 397    | 44   | 50.71                   | 3.9                | 100     |
| Mtpn          | 6          | 35460812  | 35462059  | 1248   | 372    | 57   | 58.86                   | 3.32               | 100     |
| Nav3          | 10         | 109227338 | 109228558 | 1221   | 276    | 55   | 83.74                   | 4.1                | 100     |
| Nckap1        | 2          | 80401533  | 80402777  | 1245   | 240    | 47   | 51.99                   | 3.29               | 100     |
| Nfib          | 4          | 81976124  | 81977343  | 1220   | 445    | 55   | 75.94                   | 4.01               | 100     |
| Oxr1          | 15         | 41627891  | 41629149  | 1259   | 432    | 46   | 52.87                   | 3.59               | 100     |
| Pbrm1         | 14         | 31833037  | 31834187  | 1151   | 570    | 62   | 58.57                   | 3.49               | 100     |
| Pdpk1         | 17         | 24252797  | 24253831  | 1035   | 720    | 44   | 51.25                   | 3.48               | 100     |
| Pias1         | 9          | 62779969  | 62781116  | 1148   | 560    | 58   | 58.47                   | 3.63               | 100     |
| Pigu          | 2          | 155145926 | 155147526 | 1601   | 1190   | 67   | 53.93                   | 3.7                | 100     |
| Pip5k1b       | 19         | 24525744  | 24527536  | 1793   | 493    | 90   | 57.11                   | 3.35               | 100     |
| Ptk2          | 15         | 73065046  | 73066215  | 1170   | 376    | 51   | 61.8                    | 3.4                | 100     |
| Rasal2        | 1          | 159221207 | 159221896 | 690    | 481    | 31   | 52.12                   | 4.24               | 100     |
| Rasal2        | 1          | 159228370 | 159229711 | 1342   | 848    | 56   | 51.93                   | 4.65               | 100     |
| Rfx3          | 19         | 28070549  | 28071687  | 1139   | 212    | 49   | 52.39                   | 3.1                | 100     |
| Slk           | 19         | 47661127  | 47662789  | 1663   | 382    | 71   | 53.31                   | 3.73               | 100     |
| Tcf4          | 18         | 69814982  | 69816327  | 1346   | 858    | 74   | 50.32                   | 3.25               | 100     |
| Tmtc1         | 6          | 148307275 | 148308871 | 1597   | 207    | 72   | 65.73                   | 2.67               | 100     |
| Tspan9        | 6          | 128044056 | 128047098 | 3043   | 586    | 150  | 51.3                    | 2.85               | 100     |



|                        |    |           |           |      |      |     |       |      |     |
|------------------------|----|-----------|-----------|------|------|-----|-------|------|-----|
| Usp25                  | 16 | 77033908  | 77036072  | 2165 | 690  | 113 | 56.84 | 3.06 | 100 |
| Wdr42a                 | 1  | 174091043 | 174094034 | 2992 | 644  | 136 | 80.58 | 2.92 | 100 |
| Epb4.1l2-C030003D03Rik | 10 | 25259332  | 25260314  | 983  | 576  | 42  | 62.27 | 4.8  | 100 |
| Ddo-9030224M15Rik      | 10 | 40370772  | 40373525  | 2754 | 2404 | 126 | 68.55 | 2.79 | 100 |
| Tfam-Ube2d1            | 10 | 70701096  | 70702130  | 1035 | 537  | 45  | 56.2  | 4.79 | 100 |
| Zdhhc17-Osbpl8         | 10 | 110533915 | 110534983 | 1069 | 507  | 52  | 52.34 | 3.91 | 100 |
| Abcb5-ltgb8            | 12 | 120223418 | 120224828 | 1411 | 865  | 58  | 79.65 | 4.52 | 100 |
| plk2-Actbl2            | 13 | 111374917 | 111376424 | 1508 | 1026 | 69  | 71.72 | 3.15 | 100 |
| D930020E02Rik-Entpd4   | 14 | 69934402  | 69935377  | 976  | 442  | 37  | 52.96 | 4.68 | 100 |
| 4932438H23Rik-Olig2    | 16 | 91081805  | 91082642  | 838  | 319  | 40  | 52.29 | 4.2  | 100 |
| T-Pde10a               | 17 | 8678930   | 8681107   | 2178 | 570  | 103 | 53.93 | 3.08 | 100 |
| Dtna-Mapre2            | 18 | 23960998  | 23962346  | 1349 | 441  | 68  | 62.25 | 3.18 | 100 |
| Zfp608-Gramd3          | 18 | 55155607  | 55159639  | 4033 | 802  | 187 | 67.12 | 2.73 | 100 |
| Ide-Kif11              | 19 | 37448753  | 37450566  | 1814 | 1012 | 96  | 56.08 | 3.1  | 100 |
| Srp14-Bmf              | 2  | 118336620 | 118337427 | 808  | 450  | 33  | 55.01 | 4.13 | 100 |
| Myef2-Slc12a1          | 2  | 124946238 | 124948271 | 2034 | 1494 | 88  | 50.16 | 2.43 | 100 |
| Gm1527-Evi1            | 3  | 29588082  | 29589155  | 1074 | 207  | 45  | 65.83 | 3.72 | 100 |
| Fbxw7-Pet112l          | 3  | 85333843  | 85335721  | 1879 | 514  | 79  | 52.52 | 3.52 | 100 |
| Slc25a44-Sema4a        | 3  | 88229742  | 88231166  | 1425 | 572  | 69  | 53.36 | 2.92 | 100 |
| 1810037l17Rik-Usp53    | 3  | 122634200 | 122635145 | 946  | 478  | 36  | 52.18 | 5.5  | 100 |
| Zfp292-Cga             | 4  | 34831735  | 34833570  | 1836 | 453  | 83  | 55.87 | 3.66 | 100 |
| Rnf38-Melk             | 4  | 44248398  | 44249385  | 988  | 561  | 45  | 52.3  | 4.41 | 100 |
| Oma1-Dab1              | 4  | 103341495 | 103342289 | 795  | 208  | 34  | 60.67 | 4.95 | 100 |
| Oma1-Dab1              | 4  | 103454290 | 103455426 | 1137 | 732  | 53  | 60.26 | 3.5  | 100 |
| Sez6l-Adrbk2           | 5  | 113336575 | 113337752 | 1178 | 652  | 51  | 77.87 | 4.79 | 100 |
| Adrbk2-Crybb2          | 5  | 113477929 | 113479155 | 1227 | 358  | 56  | 55.75 | 3.06 | 100 |
| Luzp2-Siglech          | 7  | 63000256  | 63001196  | 941  | 580  | 40  | 68.58 | 5.23 | 100 |
| EG630138-Clpb          | 7  | 108766673 | 108768895 | 2223 | 1091 | 124 | 76.12 | 3.28 | 100 |
| Zmat4-1810011O10Rik    | 8  | 25330818  | 25332125  | 1308 | 496  | 55  | 63.6  | 3.56 | 100 |
| Apoa5-Cadm1            | 9  | 46543451  | 46545616  | 2166 | 562  | 111 | 50.7  | 2.56 | 100 |
| Senp8-Nr2e3            | 9  | 59603009  | 59604012  | 1004 | 559  | 44  | 73.82 | 4.52 | 100 |
| Rbm3-Tbc1d25           | X  | 7722960   | 7723790   | 831  | 205  | 37  | 53.13 | 3.75 | 100 |

---

Supplementary Table 4. DAVID analysis of genes differentially acetylated for H4K5 in FC over control as identified by MACS

| Category        | Term                                                | Count | %     | P-value  | List Total | Pop Hits | Pop Total | Fold Enrichment | Bonferroni | Benjamini | FDR   |
|-----------------|-----------------------------------------------------|-------|-------|----------|------------|----------|-----------|-----------------|------------|-----------|-------|
| GOTERM_CC_FAT   | GO:0045202~synapse                                  | 11    | 10.48 | 1.52E-05 | 74         | 319      | 12504     | 5.83            | 0.00       | 0.00      | 0.02  |
| GOTERM_CC_FAT   | GO:0000267~cell fraction                            | 13    | 12.38 | 1.57E-04 | 74         | 596      | 12504     | 3.69            | 0.03       | 0.01      | 0.19  |
| SP_PIR_KEYWORDS | antiport                                            | 4     | 3.81  | 5.13E-04 | 98         | 29       | 17854     | 25.13           | 0.08       | 0.08      | 0.62  |
| GOTERM_CC_FAT   | GO:0005624~membrane fraction                        | 11    | 10.48 | 7.19E-04 | 74         | 510      | 12504     | 3.64            | 0.11       | 0.04      | 0.87  |
| GOTERM_CC_FAT   | GO:0005626~insoluble fraction                       | 11    | 10.48 | 9.38E-04 | 74         | 528      | 12504     | 3.52            | 0.15       | 0.04      | 1.14  |
| INTERPRO        | IPR011993:Pleckstrin homology-type                  | 8     | 7.62  | 0.0012   | 100        | 289      | 17763     | 4.92            | 0.30       | 0.30      | 1.56  |
| GOTERM_CC_FAT   | GO:0044456~synapse part                             | 7     | 6.67  | 0.0015   | 74         | 212      | 12504     | 5.58            | 0.22       | 0.05      | 1.77  |
| SP_PIR_KEYWORDS | Endocytosis                                         | 5     | 4.76  | 0.0017   | 98         | 93       | 17854     | 9.79            | 0.23       | 0.13      | 1.98  |
| GOTERM_BP_FAT   | GO:0050808~synapse organization                     | 4     | 3.81  | 0.0024   | 75         | 49       | 13588     | 14.79           | 0.86       | 0.86      | 3.61  |
| SP_PIR_KEYWORDS | alternative splicing                                | 38    | 36.19 | 0.0030   | 98         | 4481     | 17854     | 1.54            | 0.39       | 0.15      | 3.58  |
| GOTERM_MF_FAT   | GO:0015491~cation:cation antiporter activity        | 3     | 2.86  | 0.0032   | 77         | 15       | 13288     | 34.51           | 0.52       | 0.52      | 4.06  |
| GOTERM_BP_FAT   | GO:0055080~cation homeostasis                       | 6     | 5.71  | 0.0033   | 75         | 184      | 13588     | 5.91            | 0.93       | 0.74      | 4.92  |
| GOTERM_BP_FAT   | GO:0007416~synaptogenesis                           | 3     | 2.86  | 0.0033   | 75         | 16       | 13588     | 33.97           | 0.94       | 0.60      | 5.03  |
| GOTERM_CC_FAT   | GO:0030424~axon                                     | 5     | 4.76  | 0.0035   | 74         | 107      | 12504     | 7.90            | 0.45       | 0.09      | 4.19  |
| GOTERM_BP_FAT   | GO:0006897~endocytosis                              | 6     | 5.71  | 0.0036   | 75         | 188      | 13588     | 5.78            | 0.95       | 0.52      | 5.38  |
| GOTERM_BP_FAT   | GO:0010324~membrane invagination                    | 6     | 5.71  | 0.0036   | 75         | 188      | 13588     | 5.78            | 0.95       | 0.52      | 5.38  |
| GOTERM_MF_FAT   | GO:0015297~antiporter activity                      | 4     | 3.81  | 0.0038   | 77         | 55       | 13288     | 12.55           | 0.58       | 0.35      | 4.77  |
| GOTERM_BP_FAT   | GO:0042592~homeostatic process                      | 10    | 9.52  | 0.0043   | 75         | 584      | 13588     | 3.10            | 0.97       | 0.51      | 6.43  |
| GOTERM_BP_FAT   | GO:0006811~ion transport                            | 11    | 10.48 | 0.0050   | 75         | 712      | 13588     | 2.80            | 0.98       | 0.50      | 7.50  |
| GOTERM_CC_FAT   | GO:0005794~Golgi apparatus                          | 11    | 10.48 | 0.0060   | 74         | 682      | 12504     | 2.73            | 0.64       | 0.14      | 7.10  |
| UP_SEQ_FEATURE  | domain:PH                                           | 6     | 5.71  | 0.0064   | 94         | 202      | 16021     | 5.06            | 0.98       | 0.98      | 9.05  |
| BIOCARTA        | m_appPathway:Generation of amyloid b-peptide by PS1 | 2     | 1.90  | 0.0068   | 3          | 4        | 1171      | 195.17          | 0.03       | 0.03      | 2.93  |
| GOTERM_BP_FAT   | GO:0009100~glycoprotein metabolic process           | 5     | 4.76  | 0.0084   | 75         | 147      | 13588     | 6.16            | 1.00       | 0.63      | 12.22 |
| GOTERM_BP_FAT   | GO:0043062~extracellular structure organization     | 5     | 4.76  | 0.0088   | 75         | 149      | 13588     | 6.08            | 1.00       | 0.60      | 12.76 |
| GOTERM_MF_FAT   | GO:0015298~solute:cation antiporter activity        | 3     | 2.86  | 0.0089   | 77         | 25       | 13288     | 20.71           | 0.87       | 0.49      | 10.82 |
| SP_PIR_KEYWORDS | phosphoprotein                                      | 47    | 44.76 | 0.0094   | 98         | 6311     | 17854     | 1.36            | 0.78       | 0.32      | 10.76 |
| SP_PIR_KEYWORDS | ion transport                                       | 9     | 8.57  | 0.0094   | 98         | 543      | 17854     | 3.02            | 0.78       | 0.26      | 10.83 |
| SP_PIR_KEYWORDS | golgi apparatus                                     | 9     | 8.57  | 0.0105   | 98         | 553      | 17854     | 2.97            | 0.82       | 0.25      | 11.94 |
| GOTERM_CC_FAT   | GO:0042734~presynaptic membrane                     | 3     | 2.86  | 0.0115   | 74         | 28       | 12504     | 18.10           | 0.86       | 0.22      | 13.16 |
| GOTERM_BP_FAT   | GO:0055085~transmembrane transport                  | 8     | 7.62  | 0.0124   | 75         | 460      | 13588     | 3.15            | 1.00       | 0.68      | 17.54 |
| GOTERM_BP_FAT   | GO:0006874~cellular calcium ion homeostasis         | 4     | 3.81  | 0.0134   | 75         | 91       | 13588     | 7.96            | 1.00       | 0.67      | 18.73 |
| GOTERM_CC_FAT   | GO:0043005~neuron projection                        | 6     | 5.71  | 0.0141   | 74         | 245      | 12504     | 4.14            | 0.91       | 0.23      | 15.92 |
| UP_SEQ_FEATURE  | splice variant                                      | 37    | 35.24 | 0.0142   | 94         | 4448     | 16021     | 1.42            | 1.00       | 0.98      | 18.94 |
| SP_PIR_KEYWORDS | nucleotide-binding                                  | 17    | 16.19 | 0.0144   | 98         | 1631     | 17854     | 1.90            | 0.90       | 0.28      | 16.08 |
| GOTERM_BP_FAT   | GO:0055074~calcium ion homeostasis                  | 4     | 3.81  | 0.0150   | 75         | 95       | 13588     | 7.63            | 1.00       | 0.68      | 20.78 |
| INTERPRO        | IPR001849:Pleckstrin homology                       | 6     | 5.71  | 0.0154   | 100        | 261      | 17763     | 4.08            | 0.99       | 0.91      | 18.82 |
| GOTERM_BP_FAT   | GO:0016044~membrane organization                    | 6     | 5.71  | 0.0163   | 75         | 272      | 13588     | 4.00            | 1.00       | 0.67      | 22.32 |
| GOTERM_BP_FAT   | GO:0006875~cellular metal ion homeostasis           | 4     | 3.81  | 0.0172   | 75         | 100      | 13588     | 7.25            | 1.00       | 0.67      | 23.45 |
| SP_PIR_KEYWORDS | cytoplasm                                           | 26    | 24.76 | 0.0182   | 98         | 3029     | 17854     | 1.56            | 0.95       | 0.31      | 19.91 |
| GOTERM_CC_FAT   | GO:0042995~cell projection                          | 9     | 8.57  | 0.0185   | 74         | 575      | 12504     | 2.64            | 0.96       | 0.27      | 20.35 |
| INTERPRO        | IPR012680:Laminin G, subdomain 2                    | 3     | 2.86  | 0.0199   | 100        | 39       | 17763     | 13.66           | 1.00       | 0.88      | 23.69 |
| GOTERM_BP_FAT   | GO:0055065~metal ion homeostasis                    | 4     | 3.81  | 0.0201   | 75         | 106      | 13588     | 6.84            | 1.00       | 0.70      | 26.80 |
| GOTERM_BP_FAT   | GO:0048666~neuron development                       | 6     | 5.71  | 0.0214   | 75         | 292      | 13588     | 3.72            | 1.00       | 0.69      | 28.33 |
| GOTERM_BP_FAT   | GO:0030182~neuron differentiation                   | 7     | 6.67  | 0.0214   | 75         | 399      | 13588     | 3.18            | 1.00       | 0.67      | 28.34 |
| GOTERM_BP_FAT   | GO:0050801~ion homeostasis                          | 6     | 5.71  | 0.0217   | 75         | 293      | 13588     | 3.71            | 1.00       | 0.65      | 28.65 |

|                 |                                                                                    |    |       |        |     |      |       |       |      |      |       |
|-----------------|------------------------------------------------------------------------------------|----|-------|--------|-----|------|-------|-------|------|------|-------|
| INTERPRO        | IPR015447:Neurexin                                                                 | 2  | 1.90  | 0.0221 | 100 | 4    | 17763 | 88.82 | 1.00 | 0.82 | 25.94 |
| GOTERM_CC_FAT   | GO:0044459~plasma membrane part                                                    | 17 | 16.19 | 0.0244 | 74  | 1633 | 12504 | 1.76  | 0.98 | 0.31 | 25.93 |
| GOTERM_MF_FAT   | GO:0015300~solute:solute antiporter activity                                       | 3  | 2.86  | 0.0251 | 77  | 43   | 13288 | 12.04 | 1.00 | 0.77 | 27.76 |
| SMART           | SM00233:PH                                                                         | 6  | 5.71  | 0.0262 | 60  | 261  | 9131  | 3.50  | 0.91 | 0.91 | 25.07 |
| GOTERM_CC_FAT   | GO:0005856~cytoskeleton                                                            | 13 | 12.38 | 0.0283 | 74  | 1122 | 12504 | 1.96  | 0.99 | 0.33 | 29.51 |
| UP_SEQ_FEATURE  | domain:Chromo 2                                                                    | 2  | 1.90  | 0.0287 | 94  | 5    | 16021 | 68.17 | 1.00 | 1.00 | 34.81 |
| SP_PIR_KEYWORDS | synapse                                                                            | 5  | 4.76  | 0.0289 | 98  | 213  | 17854 | 4.28  | 0.99 | 0.41 | 29.85 |
| GOTERM_MF_FAT   | GO:0031420~alkali metal ion binding                                                | 5  | 4.76  | 0.0303 | 77  | 206  | 13288 | 4.19  | 1.00 | 0.76 | 32.57 |
| INTERPRO        | IPR006576:BRK domain                                                               | 2  | 1.90  | 0.0330 | 100 | 6    | 17763 | 59.21 | 1.00 | 0.87 | 36.26 |
| UP_SEQ_FEATURE  | propeptide:N-terminal propeptide                                                   | 2  | 1.90  | 0.0343 | 94  | 6    | 16021 | 56.81 | 1.00 | 0.99 | 40.16 |
| GOTERM_BP_FAT   | GO:0055002~striated muscle cell development                                        | 3  | 2.86  | 0.0349 | 75  | 54   | 13588 | 10.07 | 1.00 | 0.80 | 42.14 |
| INTERPRO        | IPR001331:Guanine-nucleotide dissociation stimulator, CDC24, conserved site        | 3  | 2.86  | 0.0353 | 100 | 53   | 17763 | 10.05 | 1.00 | 0.84 | 38.24 |
| GOTERM_CC_FAT   | GO:0014069~postsynaptic density                                                    | 3  | 2.86  | 0.0357 | 74  | 51   | 12504 | 9.94  | 1.00 | 0.37 | 35.73 |
| GOTERM_BP_FAT   | GO:0030005~cellular di-, tri-valent inorganic cation homeostasis                   | 4  | 3.81  | 0.0366 | 75  | 134  | 13588 | 5.41  | 1.00 | 0.80 | 43.70 |
| GOTERM_BP_FAT   | GO:0045931~positive regulation of mitotic cell cycle                               | 2  | 1.90  | 0.0375 | 75  | 7    | 13588 | 51.76 | 1.00 | 0.79 | 44.51 |
| SMART           | SM00592:BRK                                                                        | 2  | 1.90  | 0.0382 | 60  | 6    | 9131  | 50.73 | 0.97 | 0.82 | 34.45 |
| SP_PIR_KEYWORDS | cytoskeleton                                                                       | 8  | 7.62  | 0.0395 | 98  | 583  | 17854 | 2.50  | 1.00 | 0.48 | 38.57 |
| GOTERM_CC_FAT   | GO:0005583~fibrillar collagen                                                      | 2  | 1.90  | 0.0402 | 74  | 7    | 12504 | 48.28 | 1.00 | 0.39 | 39.30 |
| UP_SEQ_FEATURE  | domain:DH                                                                          | 3  | 2.86  | 0.0419 | 94  | 56   | 16021 | 9.13  | 1.00 | 0.99 | 46.71 |
| GOTERM_BP_FAT   | GO:0032989~cellular component morphogenesis                                        | 6  | 5.71  | 0.0423 | 75  | 351  | 13588 | 3.10  | 1.00 | 0.82 | 48.63 |
| GOTERM_BP_FAT   | GO:0007191~activation of adenylate cyclase activity by dopamine receptor signaling | 2  | 1.90  | 0.0428 | 75  | 8    | 13588 | 45.29 | 1.00 | 0.80 | 48.99 |
| GOTERM_BP_FAT   | GO:0055001~muscle cell development                                                 | 3  | 2.86  | 0.0436 | 75  | 61   | 13588 | 8.91  | 1.00 | 0.80 | 49.65 |
| INTERPRO        | IPR004709:Na <sup>+</sup> /H <sup>+</sup> exchanger, subfamily                     | 2  | 1.90  | 0.0437 | 100 | 8    | 17763 | 44.41 | 1.00 | 0.86 | 45.15 |
| INTERPRO        | IPR018406:Na <sup>+</sup> /H <sup>+</sup> exchanger, conserved region              | 2  | 1.90  | 0.0437 | 100 | 8    | 17763 | 44.41 | 1.00 | 0.86 | 45.15 |
| GOTERM_MF_FAT   | GO:0032553~ribonucleotide binding                                                  | 17 | 16.19 | 0.0452 | 77  | 1796 | 13288 | 1.63  | 1.00 | 0.83 | 44.74 |
| GOTERM_MF_FAT   | GO:0032555~purine ribonucleotide binding                                           | 17 | 16.19 | 0.0452 | 77  | 1796 | 13288 | 1.63  | 1.00 | 0.83 | 44.74 |
| GOTERM_BP_FAT   | GO:0055066~di-, tri-valent inorganic cation homeostasis                            | 4  | 3.81  | 0.0453 | 75  | 146  | 13588 | 4.96  | 1.00 | 0.80 | 51.06 |
| UP_SEQ_FEATURE  | domain:Chromo 1                                                                    | 2  | 1.90  | 0.0455 | 94  | 8    | 16021 | 42.61 | 1.00 | 0.99 | 49.57 |
| SP_PIR_KEYWORDS | atp-binding                                                                        | 13 | 12.38 | 0.0459 | 98  | 1287 | 17854 | 1.84  | 1.00 | 0.50 | 43.37 |
| GOTERM_BP_FAT   | GO:0048878~chemical homeostasis                                                    | 6  | 5.71  | 0.0486 | 75  | 365  | 13588 | 2.98  | 1.00 | 0.81 | 53.61 |
| INTERPRO        | IPR018422:Cation/H <sup>+</sup> exchanger, conserved region                        | 2  | 1.90  | 0.0491 | 100 | 9    | 17763 | 39.47 | 1.00 | 0.86 | 49.12 |
| INTERPRO        | IPR004837:Sodium/calcium exchanger membrane region                                 | 2  | 1.90  | 0.0491 | 100 | 9    | 17763 | 39.47 | 1.00 | 0.86 | 49.12 |
| GOTERM_MF_FAT   | GO:0005216~ion channel activity                                                    | 6  | 5.71  | 0.0494 | 77  | 349  | 13288 | 2.97  | 1.00 | 0.81 | 47.74 |
| GOTERM_BP_FAT   | GO:0030003~cellular cation homeostasis                                             | 4  | 3.81  | 0.0500 | 75  | 152  | 13588 | 4.77  | 1.00 | 0.80 | 54.65 |
| GOTERM_MF_FAT   | GO:0015385~sodium:hydrogen antiporter activity                                     | 2  | 1.90  | 0.0503 | 77  | 9    | 13288 | 38.35 | 1.00 | 0.77 | 48.40 |
| GOTERM_MF_FAT   | GO:0005451~monovalent cation:hydrogen antiporter activity                          | 2  | 1.90  | 0.0503 | 77  | 9    | 13288 | 38.35 | 1.00 | 0.77 | 48.40 |
| INTERPRO        | IPR000219:Dbl homology (DH) domain                                                 | 3  | 2.86  | 0.0510 | 100 | 65   | 17763 | 8.20  | 1.00 | 0.84 | 50.48 |
| GOTERM_BP_FAT   | GO:0007423~sensory organ development                                               | 5  | 4.76  | 0.0515 | 75  | 257  | 13588 | 3.52  | 1.00 | 0.80 | 55.69 |
| GOTERM_BP_FAT   | GO:0042472~inner ear morphogenesis                                                 | 3  | 2.86  | 0.0515 | 75  | 67   | 13588 | 8.11  | 1.00 | 0.79 | 55.75 |
| GOTERM_MF_FAT   | GO:0005085~guanyl-nucleotide exchange factor activity                              | 4  | 3.81  | 0.0520 | 77  | 147  | 13288 | 4.70  | 1.00 | 0.74 | 49.53 |
| GOTERM_MF_FAT   | GO:0022838~substrate specific channel activity                                     | 6  | 5.71  | 0.0551 | 77  | 360  | 13288 | 2.88  | 1.00 | 0.73 | 51.59 |
| GOTERM_MF_FAT   | GO:0030695~GTPase regulator activity                                               | 6  | 5.71  | 0.0556 | 77  | 361  | 13288 | 2.87  | 1.00 | 0.70 | 51.94 |
| UP_SEQ_FEATURE  | domain:EGF-like 3                                                                  | 3  | 2.86  | 0.0563 | 94  | 66   | 16021 | 7.75  | 1.00 | 0.99 | 57.31 |
| UP_SEQ_FEATURE  | domain:EGF-like 12                                                                 | 2  | 1.90  | 0.0566 | 94  | 10   | 16021 | 34.09 | 1.00 | 0.99 | 57.51 |
| UP_SEQ_FEATURE  | domain:Fibrillar collagen NC1                                                      | 2  | 1.90  | 0.0566 | 94  | 10   | 16021 | 34.09 | 1.00 | 0.99 | 57.51 |
| GOTERM_MF_FAT   | GO:0022803~passive transmembrane transporter activity                              | 6  | 5.71  | 0.0578 | 77  | 365  | 13288 | 2.84  | 1.00 | 0.68 | 53.33 |
| GOTERM_MF_FAT   | GO:0015267~channel activity                                                        | 6  | 5.71  | 0.0578 | 77  | 365  | 13288 | 2.84  | 1.00 | 0.68 | 53.33 |
| GOTERM_MF_FAT   | GO:0060589~nucleoside-triphosphatase regulator activity                            | 6  | 5.71  | 0.0589 | 77  | 367  | 13288 | 2.82  | 1.00 | 0.66 | 54.03 |
| GOTERM_BP_FAT   | GO:0051240~positive regulation of multicellular organismal process                 | 4  | 3.81  | 0.0593 | 75  | 163  | 13588 | 4.45  | 1.00 | 0.82 | 60.98 |
| INTERPRO        | IPR000885:Fibrillar collagen, C-terminal                                           | 2  | 1.90  | 0.0596 | 100 | 11   | 17763 | 32.30 | 1.00 | 0.85 | 56.22 |
| INTERPRO        | IPR015721:Rho GTP exchange factor                                                  | 2  | 1.90  | 0.0596 | 100 | 11   | 17763 | 32.30 | 1.00 | 0.85 | 56.22 |
| GOTERM_MF_FAT   | GO:0017076~purine nucleotide binding                                               | 17 | 16.19 | 0.0617 | 77  | 1871 | 13288 | 1.57  | 1.00 | 0.65 | 55.80 |

|                 |                                                                   |    |       |        |     |      |       |       |      |      |       |
|-----------------|-------------------------------------------------------------------|----|-------|--------|-----|------|-------|-------|------|------|-------|
| UP_SEQ_FEATURE  | domain:EGF-like 11                                                | 2  | 1.90  | 0.0621 | 94  | 11   | 16021 | 30.99 | 1.00 | 0.98 | 61.00 |
| GOTERM_MF_FAT   | GO:0005089~Rho guanyl-nucleotide exchange factor activity         | 3  | 2.86  | 0.0623 | 77  | 71   | 13288 | 7.29  | 1.00 | 0.63 | 56.13 |
| SP_PIR_KEYWORDS | cell junction                                                     | 6  | 5.71  | 0.0625 | 98  | 392  | 17854 | 2.79  | 1.00 | 0.58 | 54.19 |
| GOTERM_BP_FAT   | GO:0040014~regulation of multicellular organism growth            | 3  | 2.86  | 0.0629 | 75  | 75   | 13588 | 7.25  | 1.00 | 0.83 | 63.27 |
| GOTERM_BP_FAT   | GO:0042471~ear morphogenesis                                      | 3  | 2.86  | 0.0644 | 75  | 76   | 13588 | 7.15  | 1.00 | 0.83 | 64.15 |
| INTERPRO        | IPR006153:Cation/H+ exchanger                                     | 2  | 1.90  | 0.0649 | 100 | 12   | 17763 | 29.61 | 1.00 | 0.85 | 59.38 |
| GOTERM_CC_FAT   | GO:0005886~plasma membrane                                        | 24 | 22.86 | 0.0654 | 74  | 2906 | 12504 | 1.40  | 1.00 | 0.53 | 56.14 |
| SMART           | SM00325:RhoGEF                                                    | 3  | 2.86  | 0.0659 | 60  | 65   | 9131  | 7.02  | 1.00 | 0.87 | 52.29 |
| GOTERM_MF_FAT   | GO:0005246~calcium channel regulator activity                     | 2  | 1.90  | 0.0665 | 77  | 12   | 13288 | 28.76 | 1.00 | 0.63 | 58.61 |
| UP_SEQ_FEATURE  | domain:EGF-like 15                                                | 2  | 1.90  | 0.0675 | 94  | 12   | 16021 | 28.41 | 1.00 | 0.98 | 64.20 |
| GOTERM_BP_FAT   | GO:0007215~glutamate signaling pathway                            | 2  | 1.90  | 0.0686 | 75  | 13   | 13588 | 27.87 | 1.00 | 0.84 | 66.52 |
| SMART           | SM00038:COLFI                                                     | 2  | 1.90  | 0.0689 | 60  | 11   | 9131  | 27.67 | 1.00 | 0.80 | 53.91 |
| GOTERM_BP_FAT   | GO:0007610~behavior                                               | 6  | 5.71  | 0.0696 | 75  | 405  | 13588 | 2.68  | 1.00 | 0.83 | 67.10 |
| GOTERM_BP_FAT   | GO:0019637~organophosphate metabolic process                      | 4  | 3.81  | 0.0711 | 75  | 176  | 13588 | 4.12  | 1.00 | 0.83 | 67.91 |
| UP_SEQ_FEATURE  | domain:EGF-like 14                                                | 2  | 1.90  | 0.0729 | 94  | 13   | 16021 | 26.22 | 1.00 | 0.98 | 67.13 |
| UP_SEQ_FEATURE  | domain:MAM                                                        | 2  | 1.90  | 0.0729 | 94  | 13   | 16021 | 26.22 | 1.00 | 0.98 | 67.13 |
| INTERPRO        | IPR003585:Neurexin/syndecan/glycophorin C                         | 2  | 1.90  | 0.0753 | 100 | 14   | 17763 | 25.38 | 1.00 | 0.87 | 65.05 |
| PIR_SUPERFAMILY | PIRSF005557:sialyltransferase                                     | 2  | 1.90  | 0.0759 | 41  | 16   | 8136  | 24.80 | 0.98 | 0.98 | 52.92 |
| GOTERM_BP_FAT   | GO:0046578~regulation of Ras protein signal transduction          | 4  | 3.81  | 0.0759 | 75  | 181  | 13588 | 4.00  | 1.00 | 0.84 | 70.38 |
| GOTERM_BP_FAT   | GO:0003001~generation of a signal involved in cell-cell signaling | 3  | 2.86  | 0.0767 | 75  | 84   | 13588 | 6.47  | 1.00 | 0.84 | 70.73 |
| GOTERM_BP_FAT   | GO:0048667~cell morphogenesis involved in neuron differentiation  | 4  | 3.81  | 0.0769 | 75  | 182  | 13588 | 3.98  | 1.00 | 0.83 | 70.86 |
| GOTERM_MF_FAT   | GO:0022836~gated channel activity                                 | 5  | 4.76  | 0.0772 | 77  | 281  | 13288 | 3.07  | 1.00 | 0.66 | 64.26 |
| UP_SEQ_FEATURE  | domain:EGF-like 13                                                | 2  | 1.90  | 0.0783 | 94  | 14   | 16021 | 24.35 | 1.00 | 0.98 | 69.83 |
| GOTERM_BP_FAT   | GO:0035023~regulation of Rho protein signal transduction          | 3  | 2.86  | 0.0798 | 75  | 86   | 13588 | 6.32  | 1.00 | 0.83 | 72.24 |
| PIR_SUPERFAMILY | PIRSF005557:Sialyl_trans                                          | 2  | 1.90  | 0.0804 | 41  | 17   | 8136  | 23.35 | 0.98 | 0.87 | 55.09 |
| GOTERM_MF_FAT   | GO:0005088~Ras guanyl-nucleotide exchange factor activity         | 3  | 2.86  | 0.0817 | 77  | 83   | 13288 | 6.24  | 1.00 | 0.66 | 66.44 |
| GOTERM_BP_FAT   | GO:0048839~inner ear development                                  | 3  | 2.86  | 0.0830 | 75  | 88   | 13588 | 6.18  | 1.00 | 0.84 | 73.70 |
| GOTERM_BP_FAT   | GO:0015672~monovalent inorganic cation transport                  | 5  | 4.76  | 0.0831 | 75  | 303  | 13588 | 2.99  | 1.00 | 0.83 | 73.74 |
| UP_SEQ_FEATURE  | domain:EGF-like 10                                                | 2  | 1.90  | 0.0837 | 94  | 15   | 16021 | 22.72 | 1.00 | 0.98 | 72.31 |
| GOTERM_BP_FAT   | GO:0051146~striated muscle cell differentiation                   | 3  | 2.86  | 0.0847 | 75  | 89   | 13588 | 6.11  | 1.00 | 0.83 | 74.40 |
| SP_PIR_KEYWORDS | coiled coil                                                       | 15 | 14.29 | 0.0849 | 98  | 1732 | 17854 | 1.58  | 1.00 | 0.67 | 65.83 |
| SMART           | SM00294:4.1m                                                      | 2  | 1.90  | 0.0868 | 60  | 14   | 9131  | 21.74 | 1.00 | 0.80 | 62.69 |
| GOTERM_BP_FAT   | GO:0000902~cell morphogenesis                                     | 5  | 4.76  | 0.0878 | 75  | 309  | 13588 | 2.93  | 1.00 | 0.83 | 75.74 |
| GOTERM_MF_FAT   | GO:0008092~cytoskeletal protein binding                           | 6  | 5.71  | 0.0881 | 77  | 414  | 13288 | 2.50  | 1.00 | 0.67 | 69.33 |
| INTERPRO        | IPR012163:Sialyltransferase                                       | 2  | 1.90  | 0.0907 | 100 | 17   | 17763 | 20.90 | 1.00 | 0.90 | 72.10 |
| GOTERM_CC_FAT   | GO:0012505~endomembrane system                                    | 7  | 6.67  | 0.0918 | 74  | 535  | 12504 | 2.21  | 1.00 | 0.64 | 69.02 |
| GOTERM_BP_FAT   | GO:0030001~metal ion transport                                    | 6  | 5.71  | 0.0929 | 75  | 442  | 13588 | 2.46  | 1.00 | 0.84 | 77.72 |
| SP_PIR_KEYWORDS | glycosyltransferase                                               | 4  | 3.81  | 0.0943 | 98  | 199  | 17854 | 3.66  | 1.00 | 0.68 | 69.83 |
| INTERPRO        | IPR000998:MAM                                                     | 2  | 1.90  | 0.0958 | 100 | 18   | 17763 | 19.74 | 1.00 | 0.89 | 74.12 |
| SP_PIR_KEYWORDS | sh3 domain                                                        | 4  | 3.81  | 0.0997 | 98  | 204  | 17854 | 3.57  | 1.00 | 0.68 | 71.95 |
| INTERPRO        | IPR000742:EGF-like, type 3                                        | 4  | 3.81  | 0.0999 | 100 | 199  | 17763 | 3.57  | 1.00 | 0.89 | 75.67 |

Summary of functional annotation data for genes differentially acetylated for H4K5 in FC over control (FC) using DAVID.

Supplementary Table 5. DAVID analysis of genes differentially acetylated for H4K5 in control over FC as identified by MACS

| Category        | Term                                                              | Count | %     | P-value  | List Total | Pop Hits | Pop Total | Fold Enrichment | Bonferroni | Benjamini | FDR   |
|-----------------|-------------------------------------------------------------------|-------|-------|----------|------------|----------|-----------|-----------------|------------|-----------|-------|
| GOTERM_MF_FAT   | GO:0000166~nucleotide binding                                     | 14    | 34.15 | 1.25E-04 | 28         | 2183     | 13288     | 3.04            | 0.01       | 0.01      | 0.13  |
| SP_PIR_KEYWORDS | alternative splicing                                              | 21    | 51.22 | 3.89E-04 | 40         | 4481     | 17854     | 2.09            | 0.03       | 0.03      | 0.42  |
| GOTERM_MF_FAT   | GO:0032553~ribonucleotide binding                                 | 12    | 29.27 | 4.33E-04 | 28         | 1796     | 13288     | 3.17            | 0.03       | 0.02      | 0.45  |
| GOTERM_MF_FAT   | GO:0032555~purine ribonucleotide binding                          | 12    | 29.27 | 4.33E-04 | 28         | 1796     | 13288     | 3.17            | 0.03       | 0.02      | 0.45  |
| GOTERM_MF_FAT   | GO:0017076~purine nucleotide binding                              | 12    | 29.27 | 6.20E-04 | 28         | 1871     | 13288     | 3.04            | 0.04       | 0.02      | 0.65  |
| UP_SEQ_FEATURE  | splice variant                                                    | 21    | 51.22 | 0.0010   | 39         | 4448     | 16021     | 1.94            | 0.19       | 0.19      | 1.29  |
| GOTERM_MF_FAT   | GO:0005524~ATP binding                                            | 10    | 24.39 | 0.0016   | 28         | 1443     | 13288     | 3.29            | 0.11       | 0.03      | 1.62  |
| GOTERM_MF_FAT   | GO:0032559~adenyl ribonucleotide binding                          | 10    | 24.39 | 0.0017   | 28         | 1460     | 13288     | 3.25            | 0.12       | 0.02      | 1.76  |
| GOTERM_BP_FAT   | GO:0021954~central nervous system neuron development              | 3     | 7.32  | 0.0024   | 31         | 33       | 13588     | 39.85           | 0.67       | 0.67      | 3.35  |
| GOTERM_MF_FAT   | GO:0030554~adenyl nucleotide binding                              | 10    | 24.39 | 0.0024   | 28         | 1535     | 13288     | 3.09            | 0.16       | 0.03      | 2.49  |
| GOTERM_MF_FAT   | GO:0001883~purine nucleoside binding                              | 10    | 24.39 | 0.0026   | 28         | 1548     | 13288     | 3.07            | 0.17       | 0.03      | 2.64  |
| GOTERM_MF_FAT   | GO:0001882~nucleoside binding                                     | 10    | 24.39 | 0.0027   | 28         | 1558     | 13288     | 3.05            | 0.18       | 0.02      | 2.76  |
| GOTERM_BP_FAT   | GO:0021953~central nervous system neuron differentiation          | 3     | 7.32  | 0.0038   | 31         | 42       | 13588     | 31.31           | 0.83       | 0.59      | 5.34  |
| SP_PIR_KEYWORDS | phosphoprotein                                                    | 23    | 56.10 | 0.0057   | 40         | 6311     | 17854     | 1.63            | 0.39       | 0.22      | 5.98  |
| GOTERM_MF_FAT   | GO:0003677~DNA binding                                            | 10    | 24.39 | 0.0066   | 28         | 1781     | 13288     | 2.66            | 0.39       | 0.05      | 6.72  |
| BIOCARTA        | m_CCR3Pathway:CCR3 signaling in Eosinophils                       | 3     | 7.32  | 0.0067   | 8          | 22       | 1171      | 19.96           | 0.28       | 0.28      | 6.23  |
| SP_PIR_KEYWORDS | nucleotide-binding                                                | 10    | 24.39 | 0.0074   | 40         | 1631     | 17854     | 2.74            | 0.47       | 0.19      | 7.66  |
| GOTERM_BP_FAT   | GO:0030182~neuron differentiation                                 | 5     | 12.20 | 0.0110   | 31         | 399      | 13588     | 5.49            | 0.99       | 0.82      | 14.55 |
| GOTERM_BP_FAT   | GO:0006468~protein amino acid phosphorylation                     | 6     | 14.63 | 0.0122   | 31         | 640      | 13588     | 4.11            | 1.00       | 0.76      | 16.08 |
| GOTERM_BP_FAT   | GO:0051129~negative regulation of cellular component organization | 3     | 7.32  | 0.0178   | 31         | 93       | 13588     | 14.14           | 1.00       | 0.81      | 22.59 |
| SP_PIR_KEYWORDS | kinase                                                            | 6     | 14.63 | 0.0182   | 40         | 707      | 17854     | 3.79            | 0.79       | 0.32      | 17.89 |
| INTERPRO        | IPR017441:Protein kinase, ATP binding site                        | 5     | 12.20 | 0.0188   | 40         | 467      | 17763     | 4.75            | 0.90       | 0.90      | 19.52 |
| UP_SEQ_FEATURE  | active site:Proton acceptor                                       | 6     | 14.63 | 0.0193   | 39         | 662      | 16021     | 3.72            | 0.98       | 0.86      | 21.73 |
| GOTERM_BP_FAT   | GO:0016310~phosphorylation                                        | 6     | 14.63 | 0.0193   | 31         | 718      | 13588     | 3.66            | 1.00       | 0.78      | 24.24 |
| SP_PIR_KEYWORDS | atp-binding                                                       | 8     | 19.51 | 0.0200   | 40         | 1287     | 17854     | 2.77            | 0.82       | 0.29      | 19.54 |
| INTERPRO        | IPR008266:Tyrosine protein kinase, active site                    | 3     | 7.32  | 0.0207   | 40         | 101      | 17763     | 13.19           | 0.92       | 0.71      | 21.31 |
| INTERPRO        | IPR000719:Protein kinase, core                                    | 5     | 12.20 | 0.0221   | 40         | 491      | 17763     | 4.52            | 0.93       | 0.59      | 22.60 |
| PIR_SUPERFAMILY | PIRSF000666:TyrPK_ephrin_receptor                                 | 2     | 4.88  | 0.0222   | 15         | 13       | 8136      | 83.45           | 0.30       | 0.30      | 14.71 |
| PIR_SUPERFAMILY | PIRSF002400:GTP-binding regulatory protein Gs alpha chain         | 2     | 4.88  | 0.0238   | 15         | 14       | 8136      | 77.49           | 0.32       | 0.18      | 15.75 |
| UP_SEQ_FEATURE  | domain:Protein kinase                                             | 5     | 12.20 | 0.0256   | 39         | 476      | 16021     | 4.32            | 1.00       | 0.83      | 27.84 |
| GOTERM_BP_FAT   | GO:0048666~neuron development                                     | 4     | 9.76  | 0.0260   | 31         | 292      | 13588     | 6.00            | 1.00       | 0.83      | 31.30 |
| SP_PIR_KEYWORDS | tyrosine-protein kinase                                           | 3     | 7.32  | 0.0265   | 40         | 116      | 17854     | 11.54           | 0.90       | 0.32      | 25.11 |
| UP_SEQ_FEATURE  | mutagenesis site                                                  | 6     | 14.63 | 0.0270   | 39         | 723      | 16021     | 3.41            | 1.00       | 0.75      | 29.16 |
| GOTERM_MF_FAT   | GO:0005003~ephrin receptor activity                               | 2     | 4.88  | 0.0281   | 28         | 14       | 13288     | 67.80           | 0.88       | 0.19      | 25.78 |
| INTERPRO        | IPR016257:Tyrosine-protein kinase, ephrin receptor                | 2     | 4.88  | 0.0282   | 40         | 13       | 17763     | 68.32           | 0.97       | 0.57      | 27.94 |
| GOTERM_MF_FAT   | GO:0004672~protein kinase activity                                | 5     | 12.20 | 0.0289   | 28         | 583      | 13288     | 4.07            | 0.89       | 0.18      | 26.40 |
| GOTERM_CC_FAT   | GO:0031252~cell leading edge                                      | 3     | 7.32  | 0.0294   | 31         | 112      | 12504     | 10.80           | 0.94       | 0.94      | 28.00 |
| UP_SEQ_FEATURE  | compositionally biased region:Ala-rich                            | 3     | 7.32  | 0.0294   | 39         | 113      | 16021     | 10.91           | 1.00       | 0.71      | 31.30 |
| INTERPRO        | IPR001245:Tyrosine protein kinase                                 | 3     | 7.32  | 0.0303   | 40         | 124      | 17763     | 10.74           | 0.97       | 0.52      | 29.70 |
| INTERPRO        | IPR001426:Receptor tyrosine kinase, class V, conserved site       | 2     | 4.88  | 0.0303   | 40         | 14       | 17763     | 63.44           | 0.97       | 0.46      | 29.73 |
| INTERPRO        | IPR001090:Ephrin receptor, ligand binding                         | 2     | 4.88  | 0.0303   | 40         | 14       | 17763     | 63.44           | 0.97       | 0.46      | 29.73 |
| SP_PIR_KEYWORDS | signal transduction                                               | 2     | 4.88  | 0.0323   | 40         | 15       | 17854     | 59.51           | 0.94       | 0.33      | 29.75 |
| GOTERM_BP_FAT   | GO:0030030~cell projection organization                           | 4     | 9.76  | 0.0326   | 31         | 319      | 13588     | 5.50            | 1.00       | 0.85      | 37.65 |
| GOTERM_BP_FAT   | GO:0021955~central nervous system neuron axonogenesis             | 2     | 4.88  | 0.0326   | 31         | 15       | 13588     | 58.44           | 1.00       | 0.82      | 37.67 |
| KEGG_PATHWAY    | mmu04360:Axon guidance                                            | 3     | 7.32  | 0.0342   | 14         | 131      | 5738      | 9.39            | 0.72       | 0.72      | 26.85 |

|                 |                                                                                     |   |       |        |    |      |       |       |      |      |       |
|-----------------|-------------------------------------------------------------------------------------|---|-------|--------|----|------|-------|-------|------|------|-------|
| INTERPRO        | IPR001019:Guanine nucleotide binding protein (G-protein), alpha subunit             | 2 | 4.88  | 0.0346 | 40 | 16   | 17763 | 55.51 | 0.98 | 0.45 | 33.19 |
| GOTERM_BP_FAT   | GO:0050771~negative regulation of axonogenesis                                      | 2 | 4.88  | 0.0348 | 31 | 16   | 13588 | 54.79 | 1.00 | 0.81 | 39.61 |
| SMART           | SM00615:EPH_Ibd                                                                     | 2 | 4.88  | 0.0362 | 25 | 14   | 9131  | 52.18 | 0.75 | 0.75 | 28.34 |
| GOTERM_CC_FAT   | GO:0012505~endomembrane system                                                      | 5 | 12.20 | 0.0376 | 31 | 535  | 12504 | 3.77  | 0.97 | 0.84 | 34.45 |
| UP_SEQ_FEATURE  | binding site:ATP                                                                    | 5 | 12.20 | 0.0393 | 39 | 545  | 16021 | 3.77  | 1.00 | 0.75 | 39.58 |
| GOTERM_BP_FAT   | GO:0006793~phosphorus metabolic process                                             | 6 | 14.63 | 0.0393 | 31 | 866  | 13588 | 3.04  | 1.00 | 0.82 | 43.49 |
| GOTERM_BP_FAT   | GO:0006796~phosphate metabolic process                                              | 6 | 14.63 | 0.0393 | 31 | 866  | 13588 | 3.04  | 1.00 | 0.82 | 43.49 |
| SMART           | SM00219:TyrKc                                                                       | 3 | 7.32  | 0.0416 | 25 | 124  | 9131  | 8.84  | 0.80 | 0.55 | 31.86 |
| GOTERM_BP_FAT   | GO:0010171~body morphogenesis                                                       | 2 | 4.88  | 0.0433 | 31 | 20   | 13588 | 43.83 | 1.00 | 0.82 | 46.77 |
| GOTERM_BP_FAT   | GO:0031345~negative regulation of cell projection organization                      | 2 | 4.88  | 0.0433 | 31 | 20   | 13588 | 43.83 | 1.00 | 0.82 | 46.77 |
| GOTERM_BP_FAT   | GO:0007212~dopamine receptor signaling pathway                                      | 2 | 4.88  | 0.0433 | 31 | 20   | 13588 | 43.83 | 1.00 | 0.82 | 46.77 |
| GOTERM_MF_FAT   | GO:0004713~protein tyrosine kinase activity                                         | 3 | 7.32  | 0.0434 | 28 | 164  | 13288 | 8.68  | 0.96 | 0.24 | 37.18 |
| GOTERM_CC_FAT   | GO:0042995~cell projection                                                          | 5 | 12.20 | 0.0470 | 31 | 575  | 12504 | 3.51  | 0.99 | 0.79 | 41.17 |
| SP_PIR_KEYWORDS | heterotrimer                                                                        | 2 | 4.88  | 0.0512 | 40 | 24   | 17854 | 37.20 | 0.99 | 0.43 | 43.16 |
| UP_SEQ_FEATURE  | compositionally biased region:Ser-rich                                              | 4 | 9.76  | 0.0607 | 39 | 380  | 16021 | 4.32  | 1.00 | 0.84 | 54.51 |
| GOTERM_BP_FAT   | GO:0007492~endoderm development                                                     | 2 | 4.88  | 0.0621 | 31 | 29   | 13588 | 30.23 | 1.00 | 0.90 | 59.93 |
| GOTERM_BP_FAT   | GO:0007169~transmembrane receptor protein tyrosine kinase signaling pathway         | 3 | 7.32  | 0.0667 | 31 | 192  | 13588 | 6.85  | 1.00 | 0.90 | 62.64 |
| KEGG_PATHWAY    | mmu04020:Calcium signaling pathway                                                  | 3 | 7.32  | 0.0676 | 14 | 191  | 5738  | 6.44  | 0.92 | 0.73 | 46.65 |
| GOTERM_MF_FAT   | GO:0016564~transcription repressor activity                                         | 3 | 7.32  | 0.0680 | 28 | 211  | 13288 | 6.75  | 0.99 | 0.33 | 52.13 |
| GOTERM_BP_FAT   | GO:0010579~positive regulation of adenylate cyclase activity by G-protein signaling | 2 | 4.88  | 0.0684 | 31 | 32   | 13588 | 27.40 | 1.00 | 0.89 | 63.55 |
| GOTERM_BP_FAT   | GO:0010578~regulation of adenylate cyclase activity involved in G-protein signaling | 2 | 4.88  | 0.0684 | 31 | 32   | 13588 | 27.40 | 1.00 | 0.89 | 63.55 |
| GOTERM_BP_FAT   | GO:0007189~activation of adenylate cyclase activity by G-protein signaling pathway  | 2 | 4.88  | 0.0684 | 31 | 32   | 13588 | 27.40 | 1.00 | 0.89 | 63.55 |
| GOTERM_MF_FAT   | GO:0003690~double-stranded DNA binding                                              | 2 | 4.88  | 0.0688 | 28 | 35   | 13288 | 27.12 | 0.99 | 0.31 | 52.58 |
| SP_PIR_KEYWORDS | GTP binding                                                                         | 2 | 4.88  | 0.0737 | 40 | 35   | 17854 | 25.51 | 1.00 | 0.51 | 56.14 |
| GOTERM_BP_FAT   | GO:0050768~negative regulation of neurogenesis                                      | 2 | 4.88  | 0.0807 | 31 | 38   | 13588 | 23.07 | 1.00 | 0.91 | 69.84 |
| GOTERM_CC_FAT   | GO:0005834~heterotrimeric G-protein complex                                         | 2 | 4.88  | 0.0807 | 31 | 35   | 12504 | 23.05 | 1.00 | 0.87 | 60.44 |
| SP_PIR_KEYWORDS | dna-binding                                                                         | 7 | 17.07 | 0.0822 | 40 | 1404 | 17854 | 2.23  | 1.00 | 0.52 | 60.25 |
| GOTERM_BP_FAT   | GO:0050770~regulation of axonogenesis                                               | 2 | 4.88  | 0.0827 | 31 | 39   | 13588 | 22.48 | 1.00 | 0.91 | 70.78 |
| GOTERM_BP_FAT   | GO:0031175~neuron projection development                                            | 3 | 7.32  | 0.0831 | 31 | 218  | 13588 | 6.03  | 1.00 | 0.89 | 70.98 |
| KEGG_PATHWAY    | mmu04810:Regulation of actin cytoskeleton                                           | 3 | 7.32  | 0.0844 | 14 | 217  | 5738  | 5.67  | 0.96 | 0.66 | 54.72 |
| GOTERM_BP_FAT   | GO:0010721~negative regulation of cell development                                  | 2 | 4.88  | 0.0847 | 31 | 40   | 13588 | 21.92 | 1.00 | 0.89 | 71.69 |
| GOTERM_BP_FAT   | GO:0007507~heart development                                                        | 3 | 7.32  | 0.0864 | 31 | 223  | 13588 | 5.90  | 1.00 | 0.88 | 72.43 |
| GOTERM_BP_FAT   | GO:0007190~activation of adenylate cyclase activity                                 | 2 | 4.88  | 0.0868 | 31 | 41   | 13588 | 21.38 | 1.00 | 0.87 | 72.57 |
| GOTERM_BP_FAT   | GO:0031281~positive regulation of cyclase activity                                  | 2 | 4.88  | 0.0888 | 31 | 42   | 13588 | 20.87 | 1.00 | 0.86 | 73.42 |
| GOTERM_BP_FAT   | GO:0045762~positive regulation of adenylate cyclase activity                        | 2 | 4.88  | 0.0888 | 31 | 42   | 13588 | 20.87 | 1.00 | 0.86 | 73.42 |
| GOTERM_BP_FAT   | GO:0051349~positive regulation of lyase activity                                    | 2 | 4.88  | 0.0888 | 31 | 42   | 13588 | 20.87 | 1.00 | 0.86 | 73.42 |
| GOTERM_MF_FAT   | GO:0030528~transcription regulator activity                                         | 6 | 14.63 | 0.0923 | 28 | 1206 | 13288 | 2.36  | 1.00 | 0.38 | 63.73 |
| GOTERM_BP_FAT   | GO:0010975~regulation of neuron projection development                              | 2 | 4.88  | 0.0988 | 31 | 47   | 13588 | 18.65 | 1.00 | 0.88 | 77.31 |

Summary of functional annotation data for genes differentially acetylated for H4K5 in control over FC (Control) using DAVID.

**Supplementary Table 6. Oligonucleotides used for quantitative RT-PCR**

| Gene ID  | Primer     | Sequence                | Caller | Condition |
|----------|------------|-------------------------|--------|-----------|
| Akap6    | F_akap6    | GCTCATTGCGTCTCACAAG     | MACS   | FC        |
| Akap6    | R_akap6    | ATCTCGGCTTTGATGGTGTC    | MACS   | FC        |
| Atp8a1   | F_atp8a1   | ATCCACGTCGGTACAGAACAG   | MACS   | FC        |
| Atp8a1   | R_atp8a1   | ATGGTTTCAGGCACTTGGTC    | MACS   | FC        |
| Col2a1   | F_col2a1   | GCAGCAAGAGCAAGGAAAAG    | MACS   | FC        |
| Col2a1   | R_col2a1   | GGAAAGTCATCTGGACGTTAGC  | MACS   | FC        |
| Grid1    | F_grid1    | CCGTCTCAATGATGTCATGC    | MACS   | FC        |
| Grid1    | R_grid1    | TGATCCAGGAAGCTTTGGAG    | MACS   | FC        |
| Kcnd2    | F_kcnd2    | AATGTGTCCGGGAAGCCATAG   | MACS   | FC        |
| Kcnd2    | R_kcnd2    | TGGCATTTAAGCTGGATCG     | MACS   | FC        |
| Kdm2a    | F_fbxl11   | CGAAGATGCTCTGATTGCTG    | MACS   | FC        |
| Kdm2a    | R_fbxl11   | TTATCCCTTTTTGGCCACTG    | MACS   | FC        |
| Megf11   | F_megf11   | CTTTTCGAGGACCCTTATGTCAG | MACS   | FC        |
| Megf11   | R_megf11   | TGGCAGGCACTCACAGATAC    | MACS   | FC        |
| Nrxn1    | F_nrxn1    | ACAGTGGGGATGGAAATGAC    | MACS   | FC        |
| Nrxn1    | R_nrxn1    | TTAGCACCGTTTCCCAAGTC    | MACS   | FC        |
| Ntrk2    | F_ntrk2    | GTGGCAGAAAACCTTGTAGGAG  | MACS   | FC        |
| Ntrk2    | R_ntrk2    | CAGTGAATGGAATGCACCAG    | MACS   | FC        |
| Rnf220   | F_rnf220   | TGTGTCTGGCCTCATCTCTG    | MACS   | FC        |
| Rnf220   | R_rnf220   | TGGCTGTCAAACAACGCTAC    | MACS   | FC        |
| Ryr3     | F_ryr3     | ACACCAAATCCACAGCCTTC    | MACS   | FC        |
| Ryr3     | R_ryr3     | TCCCCGACTTGATTTCTGG     | MACS   | FC        |
| Serpina9 | F_serpina9 | GCCTTTAACTCAAACGCTGAC   | MACS   | FC        |
| Serpina9 | R_serpina9 | GCGGACTATAAGTTTGGTGGTG  | MACS   | FC        |

Oligonucleotide primer sequences used for quantitative RT-PCR validation of cDNA-converted genes.
